# Supplementary material for: Luminescent Ir(iii)–Ln(iii) coordination polymers showing slow magnetization relaxation
Source: Royal Society of Chemistry journal article supplement (doi:10.1039/c9qi01504c), 2020-01-01
Supplement: c9qi01504c1.pdf [file c9qi01504c1.pdf]

## Supporting Information

### Luminescent Ir(III)–Ln(III) coordination polymers showing slow magnetization relaxation

Kun Fan,<sup>a</sup> Song-Song Bao,<sup>a</sup> Ran Huo,<sup>a</sup> Xin-Da Huang,<sup>a</sup> Yu-Jie Liu<sup>a</sup>, Zi-Wen Yu,<sup>a</sup> Mohamedally Kurmoo,<sup>b</sup> and Li-Min Zheng\*<sup>a</sup>

[a] State Key Laboratory of Coordination Chemistry, School of Chemistry and Chemical Engineering, Collaborative Innovation Center of Advanced Microstructures, Nanjing University, Nanjing 210023, P. R. China

[b] Université de Strasbourg, Institut de Chimie, CNRS-UMR7177, 4 rue Blaise Pascal, Strasbourg Cedex 67070, France.

### Table of Contents

|                                                                                                                               |     |
|-------------------------------------------------------------------------------------------------------------------------------|-----|
| <b>Table S1.</b> Selected bond lengths [Å] and angles [°] for <b>Ir<sub>2</sub>Dy</b> .                                       | S4  |
| <b>Table S2</b> Selected bond lengths [Å] and angles [°] for <b>Ir<sub>2</sub>Er</b> .                                        | S5  |
| <b>Table S3</b> Hydrogen bonds in <b>Ir<sub>2</sub>Er</b> .                                                                   | S6  |
| <b>Table S4</b> Selected bond lengths [Å] and angles [°] for <b>Ir<sub>2</sub>Yb</b> .                                        | S7  |
| <b>Table S5</b> Hydrogen bonds in <b>Ir<sub>2</sub>Yb</b> .                                                                   | S8  |
| <b>Table S6</b> Selected bond lengths [Å] and angles [°] for <b>Ir<sub>4</sub>Yb<sub>2</sub></b> .                            | S9  |
| <b>Table S7</b> Hydrogen bonds in <b>Ir<sub>4</sub>Yb<sub>2</sub></b> .                                                       | S11 |
| <b>Table S8.</b> Cell parameters of <b>Ir<sub>2</sub>Gd</b> and <b>Ir<sub>4</sub>Ln<sub>2</sub></b> .                         | S12 |
| <b>Table S9.</b> The parameters obtained by Cole-Cole fitting for <b>Ir<sub>2</sub>Dy</b> under zero dc field.                | S13 |
| <b>Table S10</b> The parameters obtained by Cole-Cole fitting for <b>Ir<sub>2</sub>Dy</b> under 2.0 kOe dc field.             | S13 |
| <b>Table S11</b> The parameters obtained by Cole-Cole fitting for <b>Ir<sub>4</sub>Dy<sub>2</sub></b> under zero dc field.    | S13 |
| <b>Table S12</b> The parameters obtained by Cole-Cole fitting for <b>Ir<sub>4</sub>Dy<sub>2</sub></b> under 2.0 kOe dc field. | S14 |
| <b>Table S13</b> The parameters obtained by Cole-Cole fitting for <b>Ir<sub>2</sub>Er</b> under 1.0 kOe dc field.             | S15 |

|                                                                                                                                                                                                                                                                           |     |
|---------------------------------------------------------------------------------------------------------------------------------------------------------------------------------------------------------------------------------------------------------------------------|-----|
| <b>Table S14</b> The parameters obtained by Cole-Cole fitting for <b>Ir<sub>4</sub>Er<sub>2</sub></b> under 1.5 kOe dc field.                                                                                                                                             | S15 |
| <b>Table S15</b> The parameters obtained by Cole-Cole fitting for <b>Ir<sub>2</sub>Yb</b> under 2.0 kOe dc field.                                                                                                                                                         | S16 |
| <b>Table S16</b> The parameters obtained by Cole-Cole fitting for <b>Ir<sub>4</sub>Yb<sub>2</sub></b> under 1.5 kOe dc field.                                                                                                                                             | S16 |
| <b>Figure S1.</b> FT-IR spectra of compounds <b>Ir<sub>2</sub>Ln</b> and the free ligand.                                                                                                                                                                                 | S17 |
| <b>Figure S2.</b> FT-IR spectra of compounds <b>Ir<sub>4</sub>Ln<sub>2</sub></b> and the free ligand.                                                                                                                                                                     | S17 |
| <b>Figure S3.</b> Molecular structure of <b>Ir<sub>2</sub>Dy</b> .                                                                                                                                                                                                        | S18 |
| <b>Figure S4.</b> Molecular structure of <b>Ir<sub>2</sub>Er</b> .                                                                                                                                                                                                        | S19 |
| <b>Figure S5.</b> Simulated and experimental powder X-ray diffraction patterns of compounds <b>Ir<sub>2</sub>Ln</b> .                                                                                                                                                     | S20 |
| <b>Figure S6.</b> Pawley fit of a powder sample of compound <b>Ir<sub>2</sub>Gd</b> .                                                                                                                                                                                     | S20 |
| <b>Figure S7.</b> Simulated and experimental powder X-ray diffraction patterns of compounds <b>Ir<sub>4</sub>Ln<sub>2</sub></b> .                                                                                                                                         | S21 |
| <b>Figure S8.</b> Pawley fit of a powder sample of compound <b>Ir<sub>4</sub>Gd<sub>2</sub></b> .                                                                                                                                                                         | S21 |
| <b>Figure S9.</b> Pawley fit of a powder sample of compound <b>Ir<sub>4</sub>Dy<sub>2</sub></b> .                                                                                                                                                                         | S22 |
| <b>Figure S10.</b> Pawley fit of a powder sample of compound <b>Ir<sub>4</sub>Er<sub>2</sub></b> .                                                                                                                                                                        | S22 |
| <b>Figure S11.</b> The $\chi_M$ vs. $T$ curves for <b>Ir<sub>2</sub>Gd</b> and <b>Ir<sub>4</sub>Gd<sub>2</sub></b> .                                                                                                                                                      | S23 |
| <b>Figure S12.</b> The plot of magnetization $M$ vs. $H$ and $M$ vs. $H/T$ at depicted temperatures for <b>Ir<sub>2</sub>Ln</b> (Ln=Dy, Er, Yb).                                                                                                                          | S24 |
| <b>Figure S13.</b> The plot of magnetization $M$ vs. $H$ and $M$ vs. $H/T$ at depicted temperatures for <b>Ir<sub>4</sub>Ln<sub>2</sub></b> (Ln = Dy, Er, Yb).                                                                                                            | S25 |
| <b>Figure S14.</b> The in-phase ( $\chi'$ ) ac susceptibilities and Cole-Cole plot of <b>Ir<sub>2</sub>Dy</b> under zero dc field.                                                                                                                                        | S26 |
| <b>Figure S15.</b> In-phase ( $\chi'$ ) and out-of-phase ( $\chi''$ ) ac susceptibilities of <b>Ir<sub>2</sub>Dy</b> collected at 1.8 K under dc fields ranging from 0 to 3.0 kOe.                                                                                        | S26 |
| <b>Figure S16.</b> The ac susceptibilities for <b>Ir<sub>2</sub>Dy</b> under 2.0 kOe dc field.                                                                                                                                                                            | S27 |
| <b>Figure S17.</b> The in-phase ( $\chi'$ ) ac susceptibilities and Cole-Cole plot of <b>Ir<sub>4</sub>Dy<sub>2</sub></b> under zero dc field.                                                                                                                            | S27 |
| <b>Figure S18.</b> In-phase ( $\chi'$ ) and out-of-phase ( $\chi''$ ) ac susceptibilities of <b>Ir<sub>4</sub>Dy<sub>2</sub></b> collected at 1.8 K under dc fields ranging from 0 to 3.0 kOe.                                                                            | S28 |
| <b>Figure S19.</b> The ac susceptibility of <b>Ir<sub>4</sub>Dy<sub>2</sub></b> under a 2.0 kOe dc field.                                                                                                                                                                 | S28 |
| <b>Figure S20.</b> In-phase ( $\chi'$ ) and out-of-phase ( $\chi''$ ) ac susceptibilities of <b>Ir<sub>2</sub>Er</b> collected at 1.8 K under dc field ranging from 0 to 3.0 kOe.                                                                                         | S29 |
| <b>Figure S21.</b> The ac susceptibilities of <b>Ir<sub>2</sub>Er</b> under a 1.0 kOe dc field at different temperatures: (a) frequency dependence of in-phase ( $\chi'$ ) and (b) out-of-phase ( $\chi''$ ), (c) Cole-Cole plot and (d) plots of $\ln(\tau)$ vs. $1/T$ . | S29 |

|                                                                                                                                                                                                                                                                                       |     |
|---------------------------------------------------------------------------------------------------------------------------------------------------------------------------------------------------------------------------------------------------------------------------------------|-----|
| <b>Figure S22.</b> In-phase ( $\chi'$ ) and out-of-phase ( $\chi''$ ) ac susceptibilities of <b>Ir<sub>4</sub>Er<sub>2</sub></b> collected at 1.8 K under dc field ranging from 0 to 3.0 kOe.                                                                                         | S30 |
| <b>Figure S23.</b> The ac susceptibilities of <b>Ir<sub>4</sub>Er<sub>2</sub></b> under a 1.5 kOe dc field at different temperatures: (a) frequency dependence of in-phase ( $\chi'$ ) and (b) out-of-phase ( $\chi''$ ), (c) Cole-Cole plot and (d) plots of $\ln(\tau)$ vs. $1/T$ . | S30 |
| <b>Figure S24.</b> In-phase ( $\chi'$ ) and out-of-phase ac susceptibility ( $\chi''$ ) of <b>Ir<sub>2</sub>Yb</b> collected at 1.8 K under dc fields ranging from 0 to 3.0 kOe.                                                                                                      | S31 |
| <b>Figure S25.</b> The in-phase ( $\chi'$ ) ac susceptibilities of <b>Ir<sub>2</sub>Yb</b> under a 1.0 kOe dc field at different temperatures.                                                                                                                                        | S31 |
| <b>Figure S26.</b> In-phase ( $\chi'$ ) and out-of-phase ( $\chi''$ ) ac susceptibilities of <b>Ir<sub>4</sub>Yb<sub>2</sub></b> collected at 1.8 K under dc field ranging from 0 to 3.0 kOe.                                                                                         | S31 |
| <b>Figure S27.</b> The in-phase ( $\chi'$ ) ac susceptibilities of <b>Ir<sub>4</sub>Yb<sub>2</sub></b> under a 1.5 kOe dc field at different temperatures.                                                                                                                            | S32 |
| <b>Figure S28.</b> The absorption spectra of Ir(ppy) <sub>2</sub> (Hdcbpy) and of compounds <b>Ir<sub>2</sub>Ln</b> and <b>Ir<sub>4</sub>Ln<sub>2</sub></b> (Ln = Gd, Dy, Er, Yb) in the solid-state.                                                                                 | S32 |
| <b>Figure S29.</b> The luminescence decay for compounds Ir(ppy) <sub>2</sub> (Hdcbpy), <b>Ir<sub>2</sub>Ln</b> and <b>Ir<sub>4</sub>Ln<sub>2</sub></b> .                                                                                                                              | S33 |
| <b>Figure S30.</b> Luminescent decay profiles monitored at 975 nm for <b>Ir<sub>2</sub>Yb</b> and <b>Ir<sub>4</sub>Yb<sub>2</sub></b> in the solid state at room temperature.                                                                                                         | S34 |
| <b>Figure S31.</b> Luminescent decay profiles monitored at 1538 nm for <b>Ir<sub>2</sub>Er</b> and <b>Ir<sub>4</sub>Er<sub>2</sub></b> in the solid state at room temperature.                                                                                                        | S35 |
| <b>Figure S32.</b> TGA curve of <b>Ir<sub>2</sub>Ln</b> and Ir(ppy) <sub>2</sub> (Hdcbpy).                                                                                                                                                                                            | S36 |
| <b>Figure S33.</b> TGA curve of <b>Ir<sub>4</sub>Ln<sub>2</sub></b> and Ir(ppy) <sub>2</sub> (Hdcbpy).                                                                                                                                                                                | S36 |

**Table S1** Selected bond lengths [Å] and angles [°] for **Ir<sub>2</sub>Dy**.

|                 |           |                 |           |
|-----------------|-----------|-----------------|-----------|
| Ir1 - N1        | 2.137(17) | Ir1 - N2        | 2.157(18) |
| Ir1 - N3        | 2.02(2)   | Ir1 - N4        | 2.04(2)   |
| Ir1 - C13       | 1.998(19) | Ir1 - C24       | 2.02(2)   |
| Ir2 - N5        | 2.134(16) | Ir2 - N6        | 2.106(16) |
| Ir2 - N7        | 2.037(19) | Ir2 - N8        | 2.044(18) |
| Ir2 - C47       | 1.97(2)   | Ir2 - C58       | 2.07(2)   |
| Dy1 - O1        | 2.270(16) | Dy1 - O1W       | 2.332(19) |
| Dy1 - O2W       | 2.384(17) | Dy1 - O3W       | 2.375(17) |
| Dy1 - O4W       | 2.50(2)   | Dy1 - O5        | 2.359(18) |
| Dy1 - O5W       | 2.48(3)   | Dy1 - O3A       | 2.376(16) |
|                 |           |                 |           |
| N1 - Ir1 - N2   | 76.4(7)   | N1 - Ir1 - N3   | 90.2(7)   |
| N1 - Ir1 - N4   | 95.1(8)   | N1 - Ir1 - C13  | 96.5(8)   |
| N1 - Ir1 - C24  | 174.2(9)  | N2 - Ir1 - N3   | 98.1(7)   |
| N2 - Ir1 - N4   | 85.4(9)   | N2 - Ir1 - C13  | 172.7(8)  |
| N2 - Ir1 - C24  | 99.6(9)   | N3 - Ir1 - N4   | 174.3(9)  |
| N3 - Ir1 - C13  | 79.9(8)   | N3 - Ir1 - C24  | 94.6(9)   |
| N4 - Ir1 - C13  | 97.2(10)  | N4 - Ir1 - C24  | 80.3(10)  |
| C13 - Ir1 - C24 | 87.6(10)  | N5 - Ir2 - N6   | 76.3(6)   |
| N5 - Ir2 - N7   | 87.4(7)   | N5 - Ir2 - N8   | 96.8(7)   |
| N5 - Ir2 - C47  | 97.5(8)   | N5 - Ir2 - C58  | 176.4(8)  |
| N6 - Ir2 - N7   | 97.1(7)   | N6 - Ir2 - N8   | 88.5(6)   |
| N6 - Ir2 - C47  | 172.9(8)  | N6 - Ir2 - C58  | 100.8(8)  |
| N7 - Ir2 - N8   | 173.7(7)  | N7 - Ir2 - C47  | 78.9(8)   |
| N7 - Ir2 - C58  | 95.1(8)   | N8 - Ir2 - C47  | 95.8(8)   |
| N8 - Ir2 - C58  | 80.9(8)   | C47 - Ir2 - C58 | 85.5(9)   |
| O1 - Dy1 - O1W  | 92.8(6)   | O1 - Dy1 - O2W  | 151.1(6)  |
| O1 - Dy1 - O3W  | 88.8(7)   | O1 - Dy1 - O4W  | 140.1(7)  |
| O1 - Dy1 - O5   | 85.9(6)   | O1 - Dy1 - O5W  | 73.2(6)   |
| O1 - Dy1 - O3A  | 79.1(6)   | O1W - Dy1 - O2W | 89.2(6)   |
| O1W - Dy1 - O3W | 142.3(8)  | O1W - Dy1 - O4W | 78.0(7)   |
| O1W - Dy1 - O5  | 147.1(7)  | O1W - Dy1 - O5W | 72.8(7)   |
| O1W - Dy1 - O3A | 73.9(6)   | O2W - Dy1 - O3W | 106.9(7)  |
| O2W - Dy1 - O4W | 68.4(7)   | O2W - Dy1 - O5  | 77.1(6)   |
| O2W - Dy1 - O5W | 134.4(6)  | O2W - Dy1 - O3A | 73.8(6)   |
| O3W - Dy1 - O4W | 76.8(7)   | O3W - Dy1 - O5  | 70.6(8)   |
| O3W - Dy1 - O5W | 71.7(8)   | O3A - Dy1 - O3W | 142.9(7)  |
| O4W - Dy1 - O5  | 122.2(7)  | O5 - Dy1 - O5W  | 136.9(7)  |
| O3A - Dy1 - O4W | 132.6(7)  | O3A - Dy1 - O5W | 134.9(7)  |
| O3A - Dy1 - O5  | 73.6(6)   | O4W - Dy1 - O5W | 67.0(7)   |

Symmetry transformations used to generate equivalent atoms: A: -1+x, y, z.

**Table S2** Selected bond lengths [ $\text{\AA}$ ] and angles [ $^\circ$ ] for **Ir<sub>2</sub>Er**.

|                              |           |                              |           |
|------------------------------|-----------|------------------------------|-----------|
| Ir1 - N1                     | 2.126(11) | Ir1 - N2                     | 2.159(12) |
| Ir1 - N3                     | 2.015(11) | Ir1 - N4                     | 2.012(14) |
| Ir1 - C13                    | 2.008(14) | Ir1 - C24                    | 1.983(17) |
| Ir2 - N5                     | 2.163(11) | Ir2 - N6                     | 2.149(12) |
| Ir2 - N7                     | 2.031(11) | Ir2 - N8                     | 2.044(11) |
| Ir2 - C47                    | 2.000(15) | Ir2 - C58                    | 2.033(14) |
| Er1 - O1                     | 2.227(11) | Er1 - O1W                    | 2.315(13) |
| Er1 - O2W                    | 2.28(2)   | Er1 - O3W                    | 2.321(11) |
| Er1 - O4W                    | 2.31(2)   | Er1 - O5                     | 2.263(12) |
| Er1 - O4W <sup>?</sup>       | 2.47(3)   | Er1 - O3A                    | 2.318(11) |
|                              |           |                              |           |
| N1 - Ir1 - N2                | 76.1(5)   | N1 - Ir1 - N3                | 90.0(4)   |
| N1 - Ir1 - N4                | 96.2(5)   | N1 - Ir1 - C13               | 95.5(5)   |
| N1 - Ir1 - C24               | 173.4(6)  | N2 - Ir1 - N3                | 98.7(5)   |
| N2 - Ir1 - N4                | 86.5(5)   | N2 - Ir1 - C13               | 171.5(5)  |
| N2 - Ir1 - C24               | 98.6(6)   | N3 - Ir1 - N4                | 172.7(5)  |
| N3 - Ir1 - C13               | 79.9(5)   | N3 - Ir1 - C24               | 94.8(6)   |
| N4 - Ir1 - C13               | 95.6(6)   | N4 - Ir1 - C24               | 79.3(7)   |
| C13 - Ir1 - C24              | 89.8(6)   | N5 - Ir2 - N6                | 74.9(4)   |
| N5 - Ir2 - N7                | 88.2(4)   | N5 - Ir2 - N8                | 95.9(4)   |
| N5 - Ir2 - C47               | 99.5(5)   | N5 - Ir2 - C58               | 174.9(5)  |
| N6 - Ir2 - N7                | 95.9(5)   | N6 - Ir2 - N8                | 90.2(5)   |
| N6 - Ir2 - C47               | 173.4(5)  | N6 - Ir2 - C58               | 102.4(5)  |
| N7 - Ir2 - N8                | 173.3(5)  | N7 - Ir2 - C47               | 80.3(6)   |
| N7 - Ir2 - C58               | 96.4(6)   | N8 - Ir2 - C47               | 93.9(6)   |
| N8 - Ir2 - C58               | 79.7(6)   | C47 - Ir2 - C58              | 83.5(6)   |
| O1 - Er1 - O1W               | 90.4(5)   | O1 - Er1 - O2W               | 166.7(6)  |
| O1 - Er1 - O3W               | 82.7(4)   | O1 - Er1 - O4W               | 116.1(7)  |
| O1 - Er1 - O5                | 94.0(4)   | O1 - Er1 - O4W <sup>?</sup>  | 78.6(6)   |
| O1 - Er1 - O3A               | 84.5(4)   | O1W - Er1 - O2W              | 84.4(7)   |
| O1W - Er1 - O3W              | 136.6(5)  | O1W - Er1 - O4W              | 74.0(8)   |
| O1W - Er1 - O5               | 148.6(5)  | O1W - Er1 - O4W <sup>?</sup> | 67.0(7)   |
| O1W - Er1 - O3A              | 74.6(4)   | O2W - Er1 - O3W              | 109.4(6)  |
| O2W - Er1 - O4W              | 74.1(9)   | O2W - Er1 - O5               | 84.4(7)   |
| O2W - Er1 - O4W <sup>?</sup> | 110.2(8)  | O2W - Er1 - O3A              | 82.4(6)   |
| O3W - Er1 - O4W              | 71.0(7)   | O3W - Er1 - O5               | 74.8(5)   |
| O3W - Er1 - O4W <sup>?</sup> | 69.6(7)   | O3A - Er1 - O3W              | 146.1(4)  |
| O4W - Er1 - O5               | 130.0(8)  | O5 - Er1 - O4W <sup>?</sup>  | 144.2(7)  |
| O3A - Er1 - O4W              | 142.2(7)  | O3A - Er1 - O4W <sup>?</sup> | 137.6(7)  |
| O3A - Er1 - O5               | 75.0(4)   |                              |           |

Symmetry transformations used to generate equivalent atoms: A: -1+x, y, z.

**Table S3** Hydrogen bonds in **Ir<sub>2</sub>Er**

| D-H...A                       | <i>d</i> (D-H) (Å) | <i>d</i> (H...A) (Å) | <i>d</i> (D...A) (Å) | ∠ DHA (°) |
|-------------------------------|--------------------|----------------------|----------------------|-----------|
| O1W-H1WA...O4 <sup>i</sup>    | 0.8500             | 1.8000               | 2.578(18)            | 152.00    |
| O1W-H1WB...O14 <sup>ii</sup>  | 0.8600             | 2.3600               | 2.95(4)              | 126.00    |
| O2W-H2WA...O16                | 0.8500             | 2.5100               | 3.16(4)              | 133.00    |
| O2W-H2WB...O10 <sup>iii</sup> | 0.8500             | 2.5100               | 3.16(5)              | 134.00    |
| O3W-H3WA...O8 <sup>ii</sup>   | 0.8500             | 2.1100               | 2.801(7)             | 136.00    |
| O3W-H3WB...O6 <sup>iv</sup>   | 0.8500             | 1.8300               | 2.666(17)            | 166.00    |
| O4W'-H5WA...O14 <sup>ii</sup> | 0.8500             | 2.4500               | 3.00(5)              | 124.00    |
| O4W'-H5WB...O3W               | 0.8500             | 2.4300               | 2.74(3)              | 102.00    |
| O6W-H6WB...O16                | 0.8500             | 2.4900               | 3.33(10)             | 173.00    |
| O9-H9A...O11                  | 0.8400             | 1.9500               | 2.68(4)              | 145.00    |
| O10-H10C...O7 <sup>v</sup>    | 0.8600             | 1.9900               | 2.69(3)              | 138.00    |

Symmetry transformations used to generate equivalent atoms: i: -1+x, y, z; ii: 1+x, y, z;  
iii: 2-x, 1-y, 1-z; iv: 1-x, 2-y, 1-z; v: 2+x, -1+y, z.

**Table S4** Selected bond lengths [ $\text{\AA}$ ] and angles [ $^\circ$ ] for **Ir<sub>2</sub>Yb**.

|                  |           |                  |          |
|------------------|-----------|------------------|----------|
| Ir1 - N1         | 2.121(7)  | Ir1 - N2         | 2.151(7) |
| Ir1 - N3         | 2.032(7)  | Ir1 - N4         | 2.034(7) |
| Ir1 - C13        | 2.001(9)  | Ir1 - C24        | 2.010(9) |
| Ir2 - N5         | 2.132(7)  | Ir2 - N6         | 2.119(7) |
| Ir2 - N7         | 2.042(7)  | Ir2 - N8         | 2.045(7) |
| Ir2 - C47        | 1.996(8)  | Ir2 - C58        | 2.003(7) |
| Yb1 - O1         | 2.191(7)  | Yb1 - O1W        | 2.286(7) |
| Yb1 - O2W        | 2.253(11) | Yb1 - O3W        | 2.291(6) |
| Yb1 - O4W        | 2.321(10) | Yb1 - O5         | 2.230(7) |
| Yb1 - O4W'       | 2.452(18) | Yb1 - O3A        | 2.298(6) |
|                  |           |                  |          |
| N1 - Ir1 - N2    | 75.3(3)   | N1 - Ir1 - N3    | 89.9(3)  |
| N1 - Ir1 - N4    | 95.8(3)   | N1 - Ir1 - C13   | 96.6(3)  |
| N1 - Ir1 - C24   | 174.4(3)  | N2 - Ir1 - N3    | 98.6(3)  |
| N2 - Ir1 - N4    | 86.4(3)   | N2 - Ir1 - C13   | 171.8(3) |
| N2 - Ir1 - C24   | 100.1(3)  | N3 - Ir1 - N4    | 173.2(3) |
| N3 - Ir1 - C13   | 80.0(3)   | N3 - Ir1 - C24   | 94.1(3)  |
| N4 - Ir1 - C13   | 95.7(4)   | N4 - Ir1 - C24   | 80.5(4)  |
| C13 - Ir1 - C24  | 88.1(4)   | N5 - Ir2 - N6    | 76.3(3)  |
| N5 - Ir2 - N7    | 88.7(3)   | N5 - Ir2 - N8    | 96.2(3)  |
| N5 - Ir2 - C47   | 97.4(3)   | N5 - Ir2 - C58   | 174.9(3) |
| N6 - Ir2 - N7    | 96.0(3)   | N6 - Ir2 - N8    | 89.5(3)  |
| N6 - Ir2 - C47   | 172.8(3)  | N6 - Ir2 - C58   | 100.4(3) |
| N7 - Ir2 - N8    | 173.4(3)  | N7 - Ir2 - C47   | 80.5(3)  |
| N7 - Ir2 - C58   | 95.5(3)   | N8 - Ir2 - C47   | 94.4(3)  |
| N8 - Ir2 - C58   | 79.9(3)   | C47 - Ir2 - C58  | 86.2(3)  |
| O1 - Yb1 - O1W   | 89.6(2)   | O1 - Yb1 - O2W   | 169.7(3) |
| O1 - Yb1 - O3W   | 82.8(2)   | O1 - Yb1 - O4W   | 115.2(3) |
| O1 - Yb1 - O5    | 95.0(2)   | O1 - Yb1 - O4W'  | 79.6(5)  |
| O1 - Yb1 - O3A   | 85.8(2)   | O1W - Yb1 - O2W  | 84.3(4)  |
| O1W - Yb1 - O3W  | 135.1(3)  | O1W - Yb1 - O4W  | 73.3(3)  |
| O1W - Yb1 - O5   | 149.8(3)  | O1W - Yb1 - O4W' | 67.4(5)  |
| O1W - Yb1 - O3A  | 75.4(2)   | O2W - Yb1 - O3W  | 107.4(3) |
| O2W - Yb1 - O4W  | 70.9(4)   | O2W - Yb1 - O5   | 86.3(4)  |
| O2W - Yb1 - O4W' | 105.4(5)  | O2W - Yb1 - O3A  | 84.7(3)  |
| O3W - Yb1 - O4W  | 70.4(3)   | O3W - Yb1 - O5   | 75.1(3)  |
| O3W - Yb1 - O4W' | 67.7(5)   | O3A - Yb1 - O3W  | 147.1(2) |
| O4W - Yb1 - O5   | 129.7(3)  | O5 - Yb1 - O4W'  | 142.7(5) |
| O3A - Yb1 - O4W  | 141.7(3)  | O3A - Yb1 - O4W' | 139.9(5) |
| O3A - Yb1 - O5   | 75.3(2)   |                  |          |

Symmetry transformations used to generate equivalent atoms: A:  $-1+x, y, z$ .

**Table S5** Hydrogen bonds in **Ir<sub>2</sub>Yb**

| D-H...A                       | <i>d</i> (D-H) (Å) | <i>d</i> (H...A) (Å) | <i>d</i> (D...A) (Å) | ∠ DHA (°) |
|-------------------------------|--------------------|----------------------|----------------------|-----------|
| O1W-H1WA...O4 <sup>i</sup>    | 0.8500             | 1.8100               | 2.600(9)             | 154.00    |
| O1W-H1WB...O14 <sup>ii</sup>  | 0.8600             | 2.2700               | 2.857(17)            | 126.00    |
| O2W-H2WA...O16                | 0.8500             | 2.5000               | 3.16(2)              | 135.00    |
| O2W-H2WB...O10 <sup>iii</sup> | 0.8500             | 2.4100               | 3.07(3)              | 135.00    |
| O3W-H3WA...O8 <sup>ii</sup>   | 0.8500             | 1.9700               | 2.649(9)             | 136.00    |
| O3W-H3WB...O6 <sup>iv</sup>   | 0.8500             | 1.8300               | 2.668(10)            | 167.00    |
| O6W-H6WB...O16                | 0.8500             | 2.5800               | 3.43(4)              | 174.00    |
| O9-H9A...O11                  | 0.8400             | 1.9400               | 2.70(2)              | 151.00    |
| O10-H10C...O7 <sup>v</sup>    | 0.8600             | 1.9600               | 2.660(14)            | 138.00    |

Symmetry transformations used to generate equivalent atoms: i: -1+x, y, z; ii: 1+x, y, z; iii: 1-x, 1-y, 1-z; iv: 1-x, 2-y, 1-z; v: 1+x, -1+y, z.



**Table S6** Selected bond lengths [ $\text{\AA}$ ] and angles [ $^\circ$ ] for **Ir<sub>4</sub>Yb<sub>2</sub>**.

|                 |           |                 |           |
|-----------------|-----------|-----------------|-----------|
| Ir1 - N1        | 2.120(15) | Ir1 - N2        | 2.160(12) |
| Ir1 - N3        | 2.029(13) | Ir1 - N4        | 2.037(12) |
| Ir1 - C23       | 2.011(19) | Ir1 - C34       | 1.999(13) |
| Ir2 - N5        | 2.123(12) | Ir2 - N6        | 2.127(13) |
| Ir2 - N7        | 2.036(15) | Ir2 - N8        | 2.022(15) |
| Ir2 - C47       | 2.011(17) | Ir2 - C58       | 2.002(14) |
| Ir3 - N9        | 2.134(13) | Ir3 - N10       | 2.159(13) |
| Ir3 - N11       | 2.030(15) | Ir3 - N12       | 2.035(15) |
| Ir3 - C81       | 2.011(17) | Ir3 - C92       | 2.023(17) |
| Ir4 - N13       | 2.108(15) | Ir4 - N14       | 2.147(13) |
| Ir4 - N15       | 2.026(13) | Ir4 - N16       | 2.040(16) |
| Ir4 - C115      | 2.038(15) | Ir4 - C126      | 2.01(2)   |
| Yb1 - O1        | 2.215(9)  | Yb1 - O1W       | 2.367(11) |
| Yb1 - O2W       | 2.306(15) | Yb1 - O5        | 2.190(8)  |
| Yb1 - O9        | 2.272(11) | Yb1 - O3b       | 2.366(12) |
| Yb1 - O28c      | 2.262(12) | Yb2 - O3W       | 2.450(11) |
| Yb2 - O4W       | 2.329(12) | Yb2 - O11       | 2.245(12) |
| Yb2 - O13       | 2.221(12) | Yb2 - O28       | 2.205(12) |
| Yb2 - O7a       | 2.289(10) | Yb2 - O15b      | 2.335(12) |
|                 |           |                 |           |
| N1 - Ir1 - N2   | 76.1(5)   | N1 - Ir1 - N3   | 94.9(5)   |
| N1 - Ir1 - N4   | 89.2(5)   | N1 - Ir1 - C23  | 175.0(6)  |
| N1 - Ir1 - C34  | 95.2(5)   | N2 - Ir1 - N3   | 89.2(5)   |
| N2 - Ir1 - N4   | 96.9(5)   | N2 - Ir1 - C23  | 101.5(6)  |
| N2 - Ir1 - C34  | 170.7(5)  | N3 - Ir1 - N4   | 173.3(6)  |
| N3 - Ir1 - C23  | 80.6(6)   | N3 - Ir1 - C34  | 94.9(5)   |
| N4 - Ir1 - C23  | 95.4(6)   | N4 - Ir1 - C34  | 79.5(5)   |
| C23 - Ir1 - C34 | 87.4(6)   | N5 - Ir2 - N6   | 77.0(5)   |
| N5 - Ir2 - N7   | 89.4(5)   | N5 - Ir2 - N8   | 95.6(6)   |
| N5 - Ir2 - C47  | 99.5(6)   | N5 - Ir2 - C58  | 172.3(5)  |
| N6 - Ir2 - N7   | 98.1(5)   | N6 - Ir2 - N8   | 87.0(5)   |
| N6 - Ir2 - C47  | 175.9(6)  | N6 - Ir2 - C58  | 95.9(5)   |
| N7 - Ir2 - N8   | 173.5(5)  | N7 - Ir2 - C47  | 79.6(6)   |
| N7 - Ir2 - C58  | 94.3(6)   | N8 - Ir2 - C47  | 95.4(7)   |
| N8 - Ir2 - C58  | 81.3(6)   | C47 - Ir2 - C58 | 87.8(6)   |
| N9 - Ir3 - N10  | 76.8(5)   | N9 - Ir3 - N11  | 87.7(5)   |
| N9 - Ir3 - N12  | 96.4(5)   | N9 - Ir3 - C81  | 96.4(6)   |
| N9 - Ir3 - C92  | 175.1(6)  | N10 - Ir3 - N11 | 95.5(6)   |
| N10 - Ir3 - N12 | 90.7(6)   | N10 - Ir3 - C81 | 172.0(6)  |
| N10 - Ir3 - C92 | 99.8(6)   | N11 - Ir3 - N12 | 173.2(5)  |
| N11 - Ir3 - C81 | 80.0(7)   | N11 - Ir3 - C92 | 96.1(7)   |

|                  |          |                   |          |
|------------------|----------|-------------------|----------|
| N12 - Ir3 - C81  | 94.2(7)  | N12 - Ir3 - C92   | 80.1(6)  |
| C81 - Ir3 - C92  | 87.3(7)  | N13 -Ir4 -N14     | 76.2(5)  |
| N13 - Ir4 - N15  | 89.7(5)  | N13 - Ir4 - N16   | 96.5(6)  |
| N13 - Ir4 - C115 | 96.3(6)  | N13 - Ir4 - C126  | 174.9(7) |
| N14 - Ir4 - N15  | 97.7(5)  | N14 - Ir4 - N16   | .9(6)    |
| N14 -Ir4 -C115   | 172.2(6) | N14 - Ir4 - C126  | 99.4(6)  |
| N15 - Ir4 - N16  | 173.0(6) | N15 - Ir4 - C115  | 79.8(6)  |
| N15 -Ir4 -C126   | 93.4(7)  | N16 - Ir4 - C115  | 96.3(6)  |
| N16 - Ir4 - C126 | 80.6(7)  | C115 - Ir4 - C126 | 88.2(7)  |
| O1 - Yb1 - O1W   | 81.4(4)  | O1 - Yb1 - O2W    | 91.4(4)  |
| O1 - Yb1 - O5    | 169.0(4) | O1 - Yb1 - O9     | 96.4(4)  |
| O1 -Yb1 - O3b    | 82.6(4)  | O1 - Yb1 - O28c   | 87.5(4)  |
| O1W - Yb1 - O2W  | 72.0(5)  | O1W - Yb1 - O5    | 87.7(4)  |
| O1W - Yb1 - O9   | 142.8(4) | O1W - Yb1 - O3b   | 144.1(4) |
| O1W - Yb1 - O28c | 71.5(4)  | O2W - Yb1 - O5    | 84.1(5)  |
| O2W - Yb1 - O9   | 145.1(5) | O2W - Yb1 - O3b   | 76.4(4)  |
| O2W - Yb1 - O28c | 143.2(4) | O5 - Yb1 - O9     | 93.0(4)  |
| O3b - Yb1 - O5   | 105.9(5) | O5 - Yb1 - O28c   | 90.2(5)  |
| O3b - Yb1 - O9   | 71.0(4)  | O9 - Yb1 - O28c   | 71.3(4)  |
| O3b - Yb1 - O28c | 139.5(4) | O3W - Yb2 - O4W   | 72.6(4)  |
| O3W - Yb2 - O11  | 95.4(4)  | O3W - Yb2 - O13   | 73.8(4)  |
| O3W - Yb2 - O28  | 74.6(4)  | O3W - Yb2 - O7a   | 144.0(4) |
| O3W - Yb2 - O15b | 138.5(4) | O4W - Yb2 - O11   | 80.0(5)  |
| O4W - Yb2 - O13  | 93.4(4)  | O4W - Yb2 - O28   | 139.2(4) |
| O4W -Yb2 - O7a   | 143.1(4) | O4W - Yb2 - O15b  | 74.3(4)  |
| O11 - Yb2 - O13  | 168.7(4) | O11 - Yb2 - O28   | 79.6(5)  |
| O7a -Yb2 - O11   | 96.3(4)  | O11 - Yb2 - O15b  | 102.8(5) |
| O13 - Yb2 - O28  | 100.2(4) | O7a - Yb2 - O13   | 94.5(4)  |
| O13 - Yb2 - O15b | 83.9(4)  | O7a - Yb2 - O28   | 74.2(4)  |
| O15b - Yb2 - O28 | 145.0(4) | O7a - Yb2 - O15b  | 70.8(4)  |

Symmetry transformations used to generate equivalent atoms: a:  $x, -2+y, z$ ; b:  $x, -1+y, z$ ; c:  $x, 1+y, z$ .

**Table S7** Hydrogen bonds in **Ir<sub>4</sub>Yb<sub>2</sub>**

| D-H...A                      | <i>d</i> (D-H) (Å) | <i>d</i> (H...A) (Å) | <i>d</i> (D...A) (Å) | ∠ DHA (°) |
|------------------------------|--------------------|----------------------|----------------------|-----------|
| O1W-H1WA...O3W <sup>i</sup>  | 0.8500             | 2.0600               | 2.897(17)            | 171.00    |
| O1W-H1WB...O10 <sup>i</sup>  | 0.8500             | 1.9100               | 2.703(16)            | 154.00    |
| O2W-H2WA...O4 <sup>ii</sup>  | 0.8500             | 1.8300               | 2.628(19)            | 157.00    |
| O2W-H2WB...O24               | 0.8500             | 1.9800               | 2.69(2)              | 140.00    |
| O3W-H3WB...O8 <sup>ii</sup>  | 0.8500             | 1.8800               | 2.679(16)            | 157.00    |
| O3W-H3WC...O6W               | 0.8500             | 2.0000               | 2.81(3)              | 159.00    |
| O4W-H4WA...O16 <sup>ii</sup> | 0.8500             | 1.9000               | 2.600(17)            | 139.00    |
| O4W-H4WB...O25 <sup>ii</sup> | 0.8500             | 2.0800               | 2.68(3)              | 128.00    |
| O5W-H5WB...O16 <sup>i</sup>  | 0.8500             | 2.0300               | 2.76(2)              | 142.00    |
| O5W-H5WC...O25 <sup>i</sup>  | 0.8500             | 2.0300               | 2.87(2)              | 169.00    |
| O24-H24A...O5W               | 0.8400             | 1.9600               | 2.69(2)              | 144.00    |
| O25-H25B...O8W               | 0.8500             | 1.8700               | 2.57(5)              | 138.00    |
| O26-H26A...O20 <sup>i</sup>  | 0.8400             | 2.1100               | 2.84(4)              | 145.00    |
| O28-H28A...O11               | 0.8500             | 2.3800               | 2.848(19)            | 115.00    |

Symmetry transformations used to generate equivalent atoms: i: x, 1+y, z; ii: x, -1+y, z.

**Table S8.** Cell parameters of **Ir<sub>2</sub>Gd** and **Ir<sub>4</sub>Ln<sub>2</sub>** (Ln = Gd, Dy, Er) were obtained by LeBail fitting the powder X-ray diffraction patterns (a) or single crystal X-ray diffraction analyses at 150 K (b).

|                       | <b>Ir<sub>2</sub>Gd<sup>a</sup></b> | <b>Ir<sub>4</sub>Gd<sub>2</sub><sup>a</sup></b> | <b>Ir<sub>4</sub>Dy<sub>2</sub><sup>a</sup></b> | <b>Ir<sub>4</sub>Dy<sub>2</sub><sup>b</sup></b> | <b>Ir<sub>4</sub>Er<sub>2</sub><sup>a</sup></b> | <b>Ir<sub>4</sub>Er<sub>2</sub><sup>b</sup></b> |
|-----------------------|-------------------------------------|-------------------------------------------------|-------------------------------------------------|-------------------------------------------------|-------------------------------------------------|-------------------------------------------------|
| crystal system        | Triclinic                           | Monoclinic                                      | Monoclinic                                      | Monoclinic                                      | Monoclinic                                      | Monoclinic                                      |
| space group           | $P\bar{1}$                          | $P2_1/c$                                        | $P2_1/c$                                        | $P2_1/c$                                        | $P2_1/c$                                        | $P2_1/c$                                        |
| $a$ [Å]               | 8.5118                              | 36.6123                                         | 36.6427                                         | 36.5349                                         | 36.5234                                         | 36.5048                                         |
| $b$ [Å]               | 18.4308                             | 8.7589                                          | 8.6936                                          | 8.6464                                          | 8.6886                                          | 8.6197                                          |
| $c$ [Å]               | 23.9822                             | 44.0515                                         | 43.9847                                         | 44.0538                                         | 44.0465                                         | 43.7404                                         |
| $\alpha$ [°]          | 71.3693                             | 90                                              | 90                                              | 90                                              | 90                                              | 90                                              |
| $\beta$ [°]           | 80.5212                             | 112.3939                                        | 112.371                                         | 112.141                                         | 112.5198                                        | 112.256                                         |
| $\gamma$ [°]          | 77.9817                             | 90                                              | 90                                              | 90                                              | 90                                              | 90                                              |
| $V$ [Å <sup>3</sup> ] | 3467.4                              | 13061.37                                        | 12957.23                                        | 12890.18                                        | 12911.90                                        | 12738.01                                        |
| $R_{wp}$ %            | 7.32                                | 5.55                                            | 9.55                                            | /                                               | 2.04                                            | /                                               |

**Table S9** The parameters obtained by Cole-Cole fitting for **Ir<sub>2</sub>Dy** under zero dc field.

| T / K | $\chi_S / \text{cm}^3 \text{ K mol}$ | $\chi_T / \text{cm}^3 \text{ K mol}$ | $\tau / \text{s}$     | $\alpha$ |
|-------|--------------------------------------|--------------------------------------|-----------------------|----------|
| 1.8   | 1.494                                | 5.329                                | $3.39 \times 10^{-5}$ | 0.362    |
| 2     | 1.349                                | 4.854                                | $3.20 \times 10^{-5}$ | 0.369    |
| 2.2   | 1.261                                | 4.452                                | $3.09 \times 10^{-5}$ | 0.369    |
| 2.4   | 1.199                                | 4.109                                | $2.99 \times 10^{-5}$ | 0.367    |
| 2.6   | 1.151                                | 3.817                                | $2.89 \times 10^{-5}$ | 0.365    |
| 2.8   | 1.107                                | 3.565                                | $2.78 \times 10^{-5}$ | 0.364    |
| 3     | 1.071                                | 3.345                                | $2.68 \times 10^{-5}$ | 0.363    |
| 3.3   | 1.038                                | 3.058                                | $2.56 \times 10^{-5}$ | 0.356    |
| 3.6   | 1.010                                | 2.819                                | $2.44 \times 10^{-5}$ | 0.351    |
| 3.9   | 0.986                                | 2.615                                | $2.34 \times 10^{-5}$ | 0.346    |

**Table S10** The parameters obtained by Cole-Cole fitting for **Ir<sub>2</sub>Dy** under 2.0 kOe dc field.

| T / K | $\chi_S$ | $\Delta\chi_1 / \text{cm}^3 \cdot \text{mol}^{-1}$ | $\tau_1 / \text{s}$   | $\alpha_1$ | $\Delta\chi_2 / \text{cm}^3 \cdot \text{mol}^{-1}$ | $\tau_2 / \text{s}$   | $\alpha_2$ |
|-------|----------|----------------------------------------------------|-----------------------|------------|----------------------------------------------------|-----------------------|------------|
| 5.4   | 0.523    | 0.091                                              | $1.78 \times 10^{-5}$ | 0          | 1.401                                              | 0.00321               | 0.602      |
| 6     | 0.557    | 0.102                                              | $1.86 \times 10^{-5}$ | 0          | 1.098                                              | 0.00158               | 0.554      |
| 6.5   | 0.507    | 0.069                                              | $1.41 \times 10^{-5}$ | 0          | 1.169                                              | 0.00108               | 0.620      |
| 7     | 0.582    | 0.109                                              | $1.83 \times 10^{-5}$ | 0          | 0.822                                              | $6.54 \times 10^{-4}$ | 0.533      |
| 7.5   | 0.595    | 0.116                                              | $1.82 \times 10^{-5}$ | 0          | 0.722                                              | $4.96 \times 10^{-4}$ | 0.533      |

**Table S11** The parameters obtained by Cole-Cole fitting for **Ir<sub>4</sub>Dy<sub>2</sub>** under zero dc field.

| T / K | $\chi_S / \text{cm}^3 \text{ K mol}$ | $\chi_T / \text{cm}^3 \text{ K mol}$ | $\tau / \text{s}$     | $\alpha$ |
|-------|--------------------------------------|--------------------------------------|-----------------------|----------|
| 1.8   | 6.36                                 | 14.28                                | $7.34 \times 10^{-5}$ | 0.446    |
| 2     | 5.89                                 | 12.86                                | $7.30 \times 10^{-5}$ | 0.449    |
| 2.2   | 5.48                                 | 11.71                                | $7.23 \times 10^{-5}$ | 0.454    |
| 2.4   | 5.18                                 | 10.73                                | $7.22 \times 10^{-5}$ | 0.453    |
| 2.6   | 4.94                                 | 9.90                                 | $7.22 \times 10^{-5}$ | 0.451    |
| 2.8   | 4.70                                 | 9.21                                 | $7.17 \times 10^{-5}$ | 0.450    |
| 3     | 4.53                                 | 8.58                                 | $7.13 \times 10^{-5}$ | 0.449    |
| 3.3   | 4.28                                 | 7.80                                 | $6.95 \times 10^{-5}$ | 0.445    |
| 3.6   | 4.09                                 | 7.14                                 | $6.80 \times 10^{-5}$ | 0.435    |
| 4     | 3.86                                 | 6.42                                 | $6.47 \times 10^{-5}$ | 0.421    |
| 4.5   | 3.50                                 | 5.74                                 | $5.42 \times 10^{-5}$ | 0.433    |
| 5     | 3.36                                 | 5.14                                 | $5.06 \times 10^{-5}$ | 0.379    |
| 5.5   | 3.08                                 | 4.69                                 | $3.92 \times 10^{-5}$ | 0.391    |
| 6     | 2.89                                 | 4.31                                 | $3.23 \times 10^{-5}$ | 0.383    |
| 7     | 2.48                                 | 3.72                                 | $1.85 \times 10^{-5}$ | 0.406    |
| 8     | 2.44                                 | 3.21                                 | $1.91 \times 10^{-5}$ | 0.255    |
| 9     | 2.21                                 | 2.88                                 | $1.33 \times 10^{-5}$ | 0.266    |

**Table S12** The parameters obtained by Cole-Cole fitting for **Ir<sub>4</sub>Dy<sub>2</sub>** under 2.0 kOe dc field.

| T / K | $\chi_S / \text{cm}^3 \text{ K mol}$ | $\chi_T / \text{cm}^3 \text{ K mol}$ | $\tau / \text{s}$     | $\alpha$ |
|-------|--------------------------------------|--------------------------------------|-----------------------|----------|
| 1.8   | 0.935                                | 9.510                                | $6.18 \times 10^{-4}$ | 0.522    |
| 2     | 1.046                                | 9.200                                | $6.12 \times 10^{-4}$ | 0.528    |
| 2.2   | 1.164                                | 8.853                                | $5.96 \times 10^{-4}$ | 0.529    |
| 2.4   | 1.260                                | 8.495                                | $5.71 \times 10^{-4}$ | 0.532    |
| 2.6   | 1.367                                | 8.106                                | $5.36 \times 10^{-4}$ | 0.529    |
| 2.8   | 1.414                                | 7.796                                | $5.06 \times 10^{-4}$ | 0.535    |
| 3     | 1.499                                | 7.448                                | $4.71 \times 10^{-4}$ | 0.531    |
| 3.3   | 1.586                                | 6.942                                | $4.07 \times 10^{-4}$ | 0.525    |
| 3.6   | 1.647                                | 6.480                                | $3.44 \times 10^{-4}$ | 0.517    |
| 4     | 1.688                                | 6.057                                | $2.87 \times 10^{-4}$ | 0.507    |
| 4.2   | 1.672                                | 5.753                                | $2.45 \times 10^{-4}$ | 0.509    |
| 4.5   | 1.720                                | 5.356                                | $1.98 \times 10^{-4}$ | 0.486    |
| 5     | 1.711                                | 4.872                                | $1.44 \times 10^{-4}$ | 0.467    |
| 5.5   | 1.581                                | 4.567                                | $1.05 \times 10^{-4}$ | 0.487    |
| 6     | 1.579                                | 4.203                                | $7.99 \times 10^{-5}$ | 0.466    |
| 6.5   | 1.593                                | 3.895                                | $6.47 \times 10^{-5}$ | 0.442    |
| 7     | 1.640                                | 3.587                                | $5.39 \times 10^{-5}$ | 0.396    |
| 8     | 1.526                                | 3.203                                | $3.57 \times 10^{-5}$ | 0.401    |
| 9     | 1.561                                | 2.831                                | $2.91 \times 10^{-5}$ | 0.333    |
| 10    | 1.519                                | 2.565                                | $2.32 \times 10^{-5}$ | 0.307    |
| 11    | 1.511                                | 2.339                                | $2.02 \times 10^{-5}$ | 0.253    |
| 12    | 1.448                                | 2.145                                | $1.64 \times 10^{-5}$ | 0.229    |
| 13    | 1.408                                | 1.985                                | $1.35 \times 10^{-5}$ | 0.196    |

**Table S13** The parameters obtained by Cole-Cole fitting for **Ir<sub>2</sub>Er** under 1.0 kOe dc field.

| T / K | $\chi_s / \text{cm}^3 \text{ K mol}$ | $\chi_T / \text{cm}^3 \text{ K mol}$ | $\tau / \text{s}$     | $\alpha$ |
|-------|--------------------------------------|--------------------------------------|-----------------------|----------|
| 1.8   | 1.139                                | 3.211                                | $5.25 \times 10^{-5}$ | 0.095    |
| 2     | 1.061                                | 2.939                                | $2.42 \times 10^{-5}$ | 0.105    |
| 2.2   | 1.034                                | 2.718                                | $1.19 \times 10^{-5}$ | 0.122    |
| 2.4   | 1.131                                | 2.533                                | $7.03 \times 10^{-5}$ | 0.140    |
| 2.6   | 1.356                                | 2.369                                | $5.59 \times 10^{-6}$ | 0.135    |

**Table S14** The parameters obtained by Cole-Cole fitting for **Ir<sub>4</sub>Er<sub>2</sub>** under 1.5 kOe dc field.

| T / K | $\chi_s / \text{cm}^3 \text{ K mol}$ | $\chi_T / \text{cm}^3 \text{ K mol}$ | $\tau / \text{s}$     | $\alpha$ |
|-------|--------------------------------------|--------------------------------------|-----------------------|----------|
| 1.8   | 1.508                                | 6.348                                | $4.47 \times 10^{-5}$ | 0.107    |
| 2     | 1.431                                | 5.870                                | $2.53 \times 10^{-5}$ | 0.109    |
| 2.2   | 1.456                                | 5.459                                | $1.44 \times 10^{-5}$ | 0.114    |
| 2.4   | 1.603                                | 5.106                                | $8.82 \times 10^{-6}$ | 0.123    |
| 2.6   | 1.912                                | 4.798                                | $6.14 \times 10^{-6}$ | 0.129    |

**Table S15** The parameters obtained by Cole-Cole fitting for **Ir<sub>2</sub>Yb** under 2.0 kOe dc field.

| T / K | $\chi_S / \text{cm}^3 \text{ K mol}$ | $\chi_T / \text{cm}^3 \text{ K mol}$ | $\tau / \text{s}$     | $\alpha$              |
|-------|--------------------------------------|--------------------------------------|-----------------------|-----------------------|
| 1.8   | 0.2105                               | 0.703                                | $9.29 \times 10^{-4}$ | 0.170                 |
| 2     | 0.200                                | 0.637                                | $7.61 \times 10^{-4}$ | 0.146                 |
| 2.2   | 0.186                                | 0.582                                | $6.33 \times 10^{-4}$ | 0.142                 |
| 2.4   | 0.173                                | 0.537                                | $5.28 \times 10^{-4}$ | 0.142                 |
| 2.6   | 0.164                                | 0.496                                | $4.37 \times 10^{-4}$ | 0.125                 |
| 2.8   | 0.158                                | 0.461                                | $3.64 \times 10^{-4}$ | 0.104                 |
| 3     | 0.150                                | 0.436                                | $3.08 \times 10^{-4}$ | 0.099                 |
| 3.3   | 0.131                                | 0.409                                | $2.32 \times 10^{-4}$ | 0.133                 |
| 3.6   | 0.118                                | 0.374                                | $1.63 \times 10^{-4}$ | 0.130                 |
| 4     | 0.127                                | 0.336                                | $1.25 \times 10^{-4}$ | 0.038                 |
| 4.2   | 0.084                                | 0.324                                | $7.23 \times 10^{-5}$ | 0.167                 |
| 4.5   | 0.078                                | 0.304                                | $5.28 \times 10^{-5}$ | 0.163                 |
| 5     | 0.074                                | 0.276                                | $3.27 \times 10^{-5}$ | 0.143                 |
| 5.5   | 0.085                                | 0.242                                | $2.26 \times 10^{-5}$ | 0.032                 |
| 6     | 0.087                                | 0.222                                | $1.62 \times 10^{-5}$ | $8.50 \times 10^{-8}$ |
| 6.5   | 0.081                                | 0.206                                | $1.11 \times 10^{-5}$ | $7.88 \times 10^{-8}$ |

**Table S16** The parameters obtained by Cole-Cole fitting for **Ir<sub>4</sub>Yb<sub>2</sub>** under 1.5 kOe dc field.

| T / K | $\chi_S$              | $\Delta\chi_1 / \text{cm}^3 \cdot \text{mol}^{-1}$ | $\tau_1 / \text{s}$   | $\alpha_1$             | $\Delta\chi_2 / \text{cm}^3 \cdot \text{mol}^{-1}$ | $\tau_2 / \text{s}$   | $\alpha_2$            |
|-------|-----------------------|----------------------------------------------------|-----------------------|------------------------|----------------------------------------------------|-----------------------|-----------------------|
| 1.8   | 0.222                 | 0.721                                              | $6.47 \times 10^{-5}$ | 0.25                   | 0.327                                              | $9.23 \times 10^{-4}$ | $5.3 \times 10^{-6}$  |
| 2     | 0.205                 | 0.685                                              | $5.80 \times 10^{-5}$ | 0.25                   | 0.288                                              | $7.96 \times 10^{-4}$ | $8.3 \times 10^{-4}$  |
| 2.2   | 0.200                 | 0.628                                              | $5.16 \times 10^{-5}$ | 0.23                   | 0.269                                              | $6.79 \times 10^{-4}$ | $1.2 \times 10^{-5}$  |
| 2.4   | 0.194                 | 0.579                                              | $4.62 \times 10^{-5}$ | 0.21                   | 0.248                                              | $5.78 \times 10^{-4}$ | $2.4 \times 10^{-5}$  |
| 2.6   | 0.163                 | 0.606                                              | $4.41 \times 10^{-5}$ | 0.26                   | 0.196                                              | $5.42 \times 10^{-4}$ | $4.1 \times 10^{-5}$  |
| 2.8   | 0.171                 | 0.529                                              | $3.82 \times 10^{-5}$ | 0.21                   | 0.202                                              | $4.46 \times 10^{-4}$ | $6.3 \times 10^{-5}$  |
| 3     | 0.174                 | 0.475                                              | $3.34 \times 10^{-5}$ | 0.17                   | 0.202                                              | $3.68 \times 10^{-4}$ | $8.7 \times 10^{-5}$  |
| 3.3   | 0.145                 | 0.489                                              | $2.92 \times 10^{-5}$ | 0.22                   | 0.156                                              | $3.09 \times 10^{-4}$ | $2.6 \times 10^{-5}$  |
| 3.6   | 0.123                 | 0.490                                              | $2.48 \times 10^{-5}$ | 0.25                   | 0.125                                              | $2.47 \times 10^{-4}$ | $4.0 \times 10^{-5}$  |
| 3.9   | 0.148                 | 0.387                                              | $1.97 \times 10^{-5}$ | 0.15                   | 0.144                                              | $1.76 \times 10^{-4}$ | $8.6 \times 10^{-5}$  |
| 4.2   | 0.141                 | 0.372                                              | $1.65 \times 10^{-5}$ | 0.16                   | 0.125                                              | $1.39 \times 10^{-4}$ | $1.2 \times 10^{-4}$  |
| 4.5   | 0.089                 | 0.454                                              | $1.34 \times 10^{-5}$ | 0.29                   | 0.068                                              | $9.52 \times 10^{-5}$ | $1.3 \times 10^{-11}$ |
| 5     | 0.130                 | 0.318                                              | $9.36 \times 10^{-6}$ | 0.14                   | 0.096                                              | $6.45 \times 10^{-5}$ | $2.2 \times 10^{-11}$ |
| 5.5   | 0.056                 | 0.380                                              | $4.86 \times 10^{-6}$ | 0.25                   | 0.067                                              | $3.83 \times 10^{-5}$ | $2.6 \times 10^{-29}$ |
| 6     | $6.28 \times 10^{-8}$ | 0.385                                              | $1.91 \times 10^{-6}$ | 0.32                   | 0.081                                              | $2.09 \times 10^{-5}$ | $1.9 \times 10^{-29}$ |
| 6.5   | $5.76 \times 10^{-8}$ | 0.327                                              | $1.94 \times 10^{-6}$ | $1.34 \times 10^{-14}$ | 0.093                                              | $1.79 \times 10^{-5}$ | $2.7 \times 10^{-29}$ |
| 7     | $7.64 \times 10^{-8}$ | 0.321                                              | $1.56 \times 10^{-6}$ | $1.47 \times 10^{-14}$ | 0.073                                              | $1.49 \times 10^{-5}$ | $3.5 \times 10^{-29}$ |



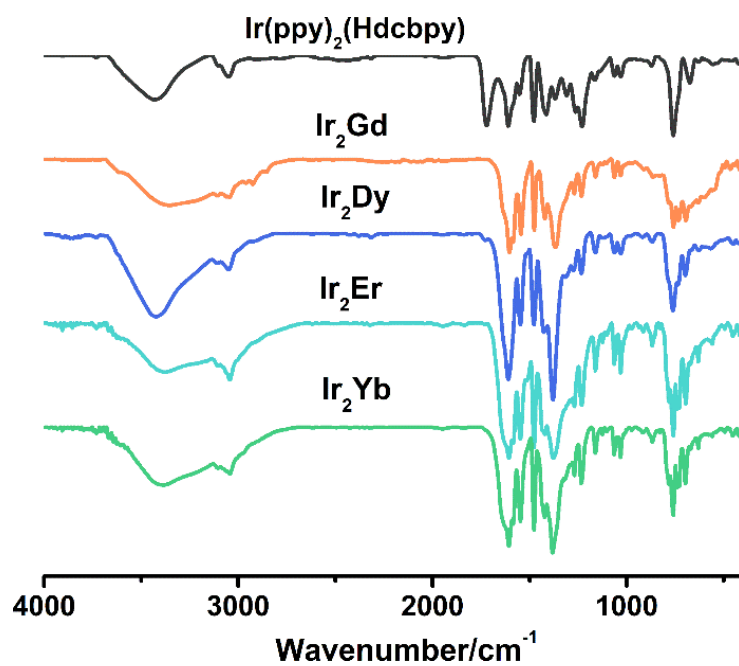

Figure S1. FT-IR spectra of compounds Ir<sub>2</sub>Ln and the free ligand.

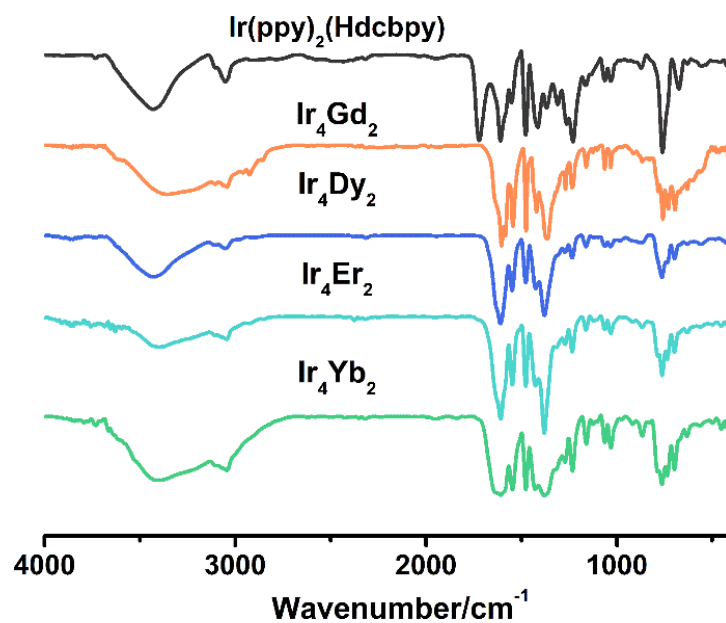

Figure S2. FT-IR spectra of compounds Ir<sub>4</sub>Ln<sub>2</sub> and the free ligand.

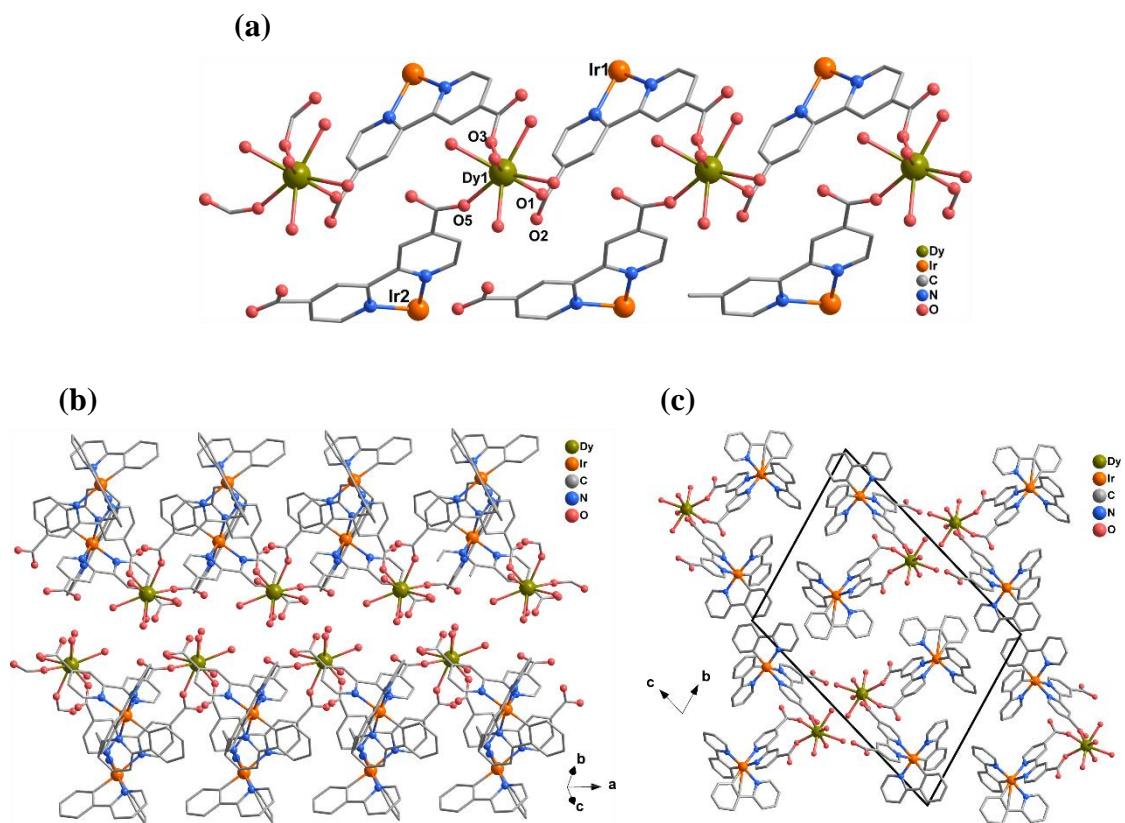

**Figure S3.** (a) One dimensional chain structure in compound **Ir<sub>2</sub>Dy**. (b) The supramolecular double-chain of **Ir<sub>2</sub>Dy**. (c) The 3D packing supramolecular framework of **Ir<sub>2</sub>Dy** along the *a*-axis.

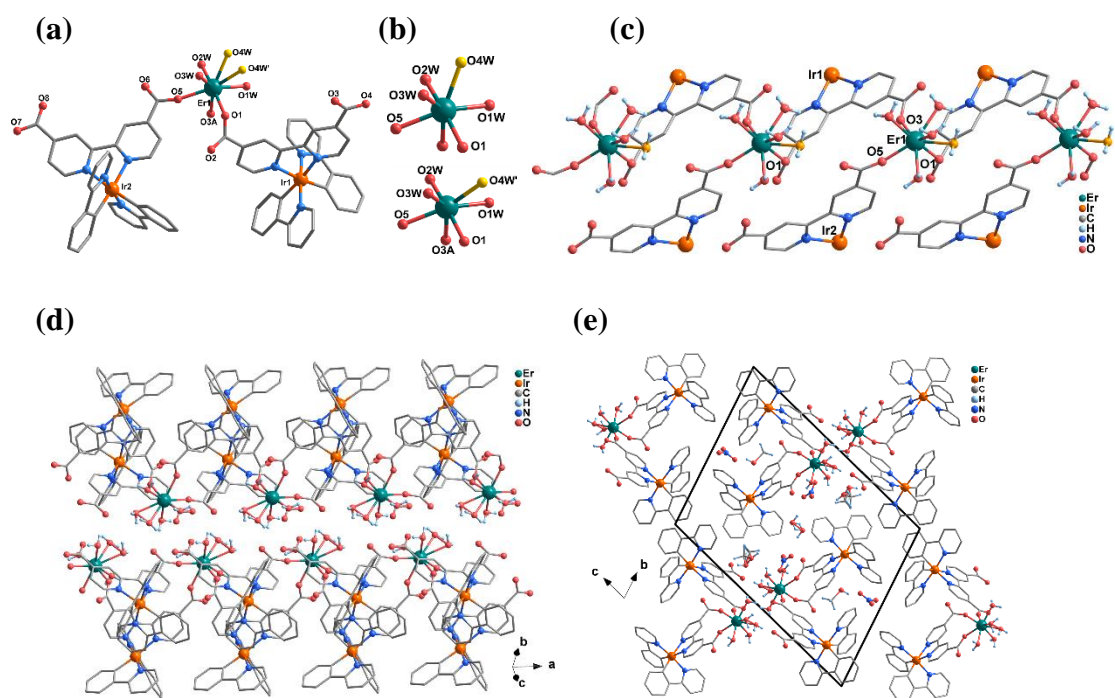

**Figure S4.** (a) Molecular structure of  $\text{Ir}_2\text{Er}$  and (b) Coordination environments of the Er(III) ions. (c) One dimensional chain structure in compound  $\text{Ir}_2\text{Er}$ . (d) The supramolecular double-chain of  $\text{Ir}_2\text{Er}$ . (e) The 3D packing supramolecular framework of  $\text{Ir}_2\text{Er}$  along the  $a$ -axis.

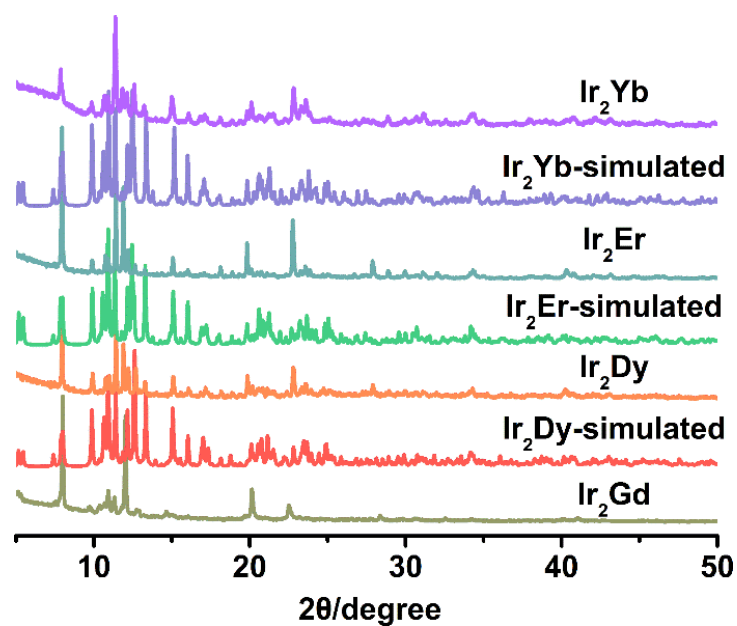

**Figure S5.** Simulated and experimental powder X-ray diffraction patterns of compounds **Ir<sub>2</sub>Ln**.

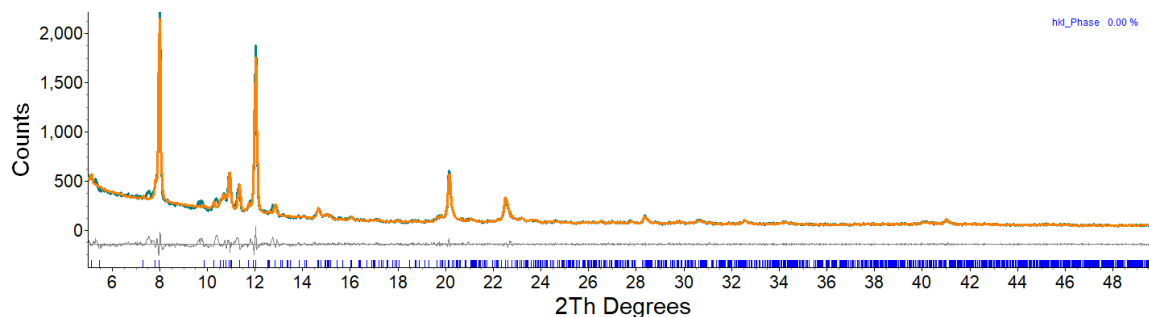

**Figure S6.** Pawley fit of a powder sample of compound **Ir<sub>2</sub>Gd** performed using *Topas 5.0* program. Green is the measured intensities, orange is the calculated intensities, and gray is the difference plot between the measured and calculated intensities (Rwp : 7.32%).

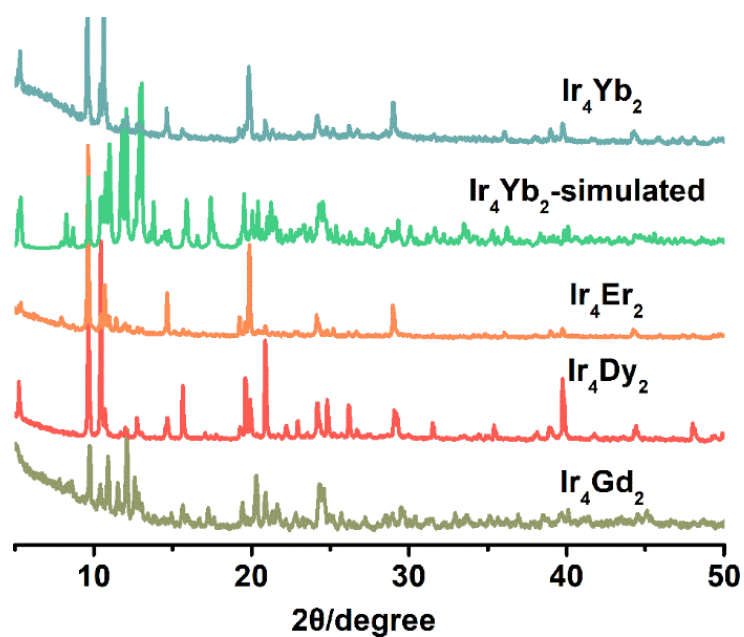

**Figure S7.** Simulated and experimental powder X-ray diffraction patterns of compounds **Ir<sub>4</sub>Ln<sub>2</sub>**.

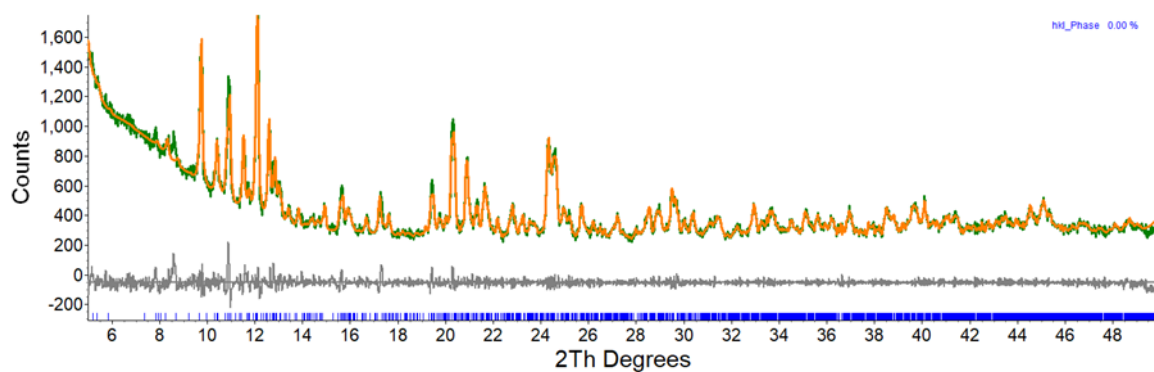

**Figure S8.** Pawley fit of a powder sample of compound **Ir<sub>4</sub>Gd<sub>2</sub>** performed using *Topas* 5.0 program. Green is the measured intensities, orange is the calculated intensities, and gray is the difference plot between the measured and calculated intensities (Rwp: 5.55%).

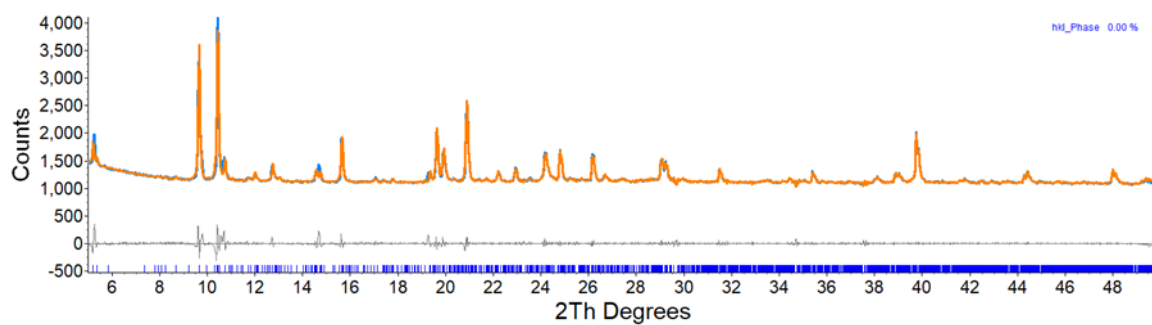

**Figure S9.** Pawley fit of a powder sample of compound  $\text{Ir}_4\text{Dy}_2$  performed using *Topas* 5.0 program. Blue is the measured intensities, orange is the calculated intensities, and gray is the difference plot between the measured and calculated intensities ( $R_{wp}$ : 5.55%).

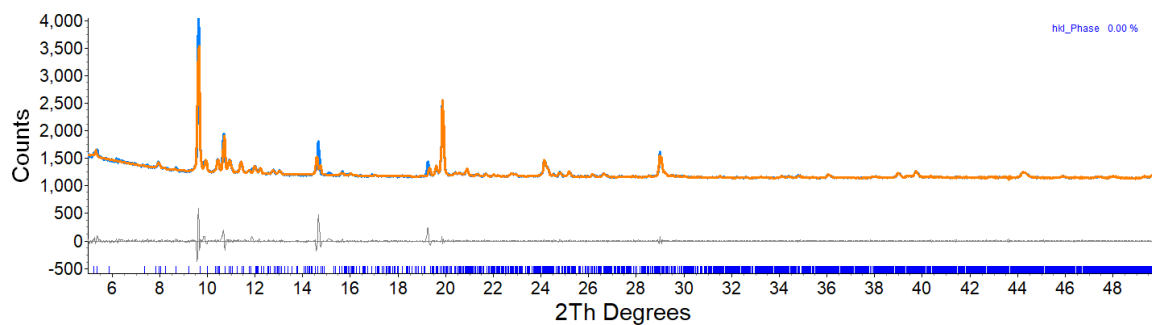

**Figure S10.** Pawley fit of a powder sample of compound  $\text{Ir}_4\text{Er}_2$  performed using *Topas* 5.0 program. Blue is the measured intensities, orange is the calculated intensities, and gray is the difference plot between the measured and calculated intensities ( $R_{wp}$ : 2.04%).

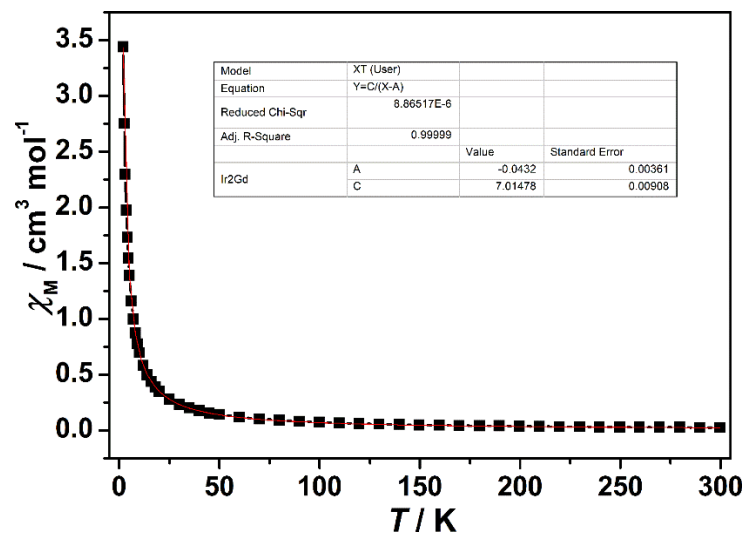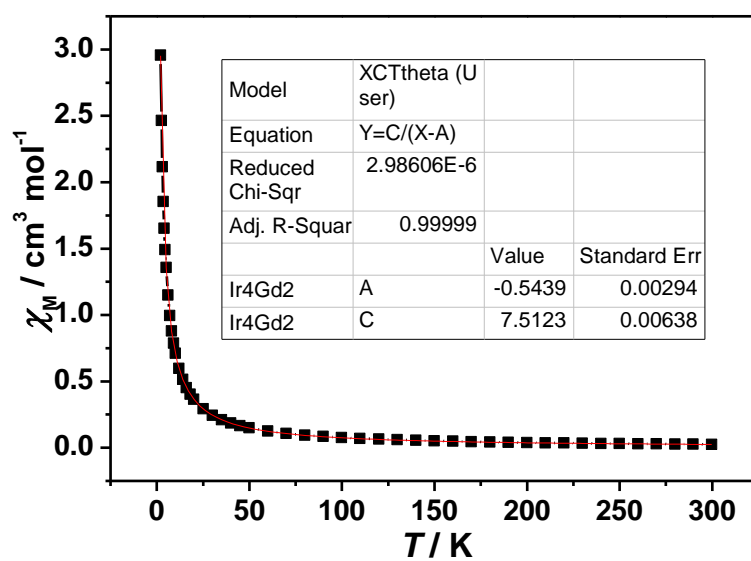

**Figure S11.** The  $\chi_M$  vs.  $T$  curves for **Ir<sub>2</sub>Gd** (top) and **Ir<sub>4</sub>Gd<sub>2</sub>** (bottom). The red solid lines represent the best fits of the data in the whole temperature range.

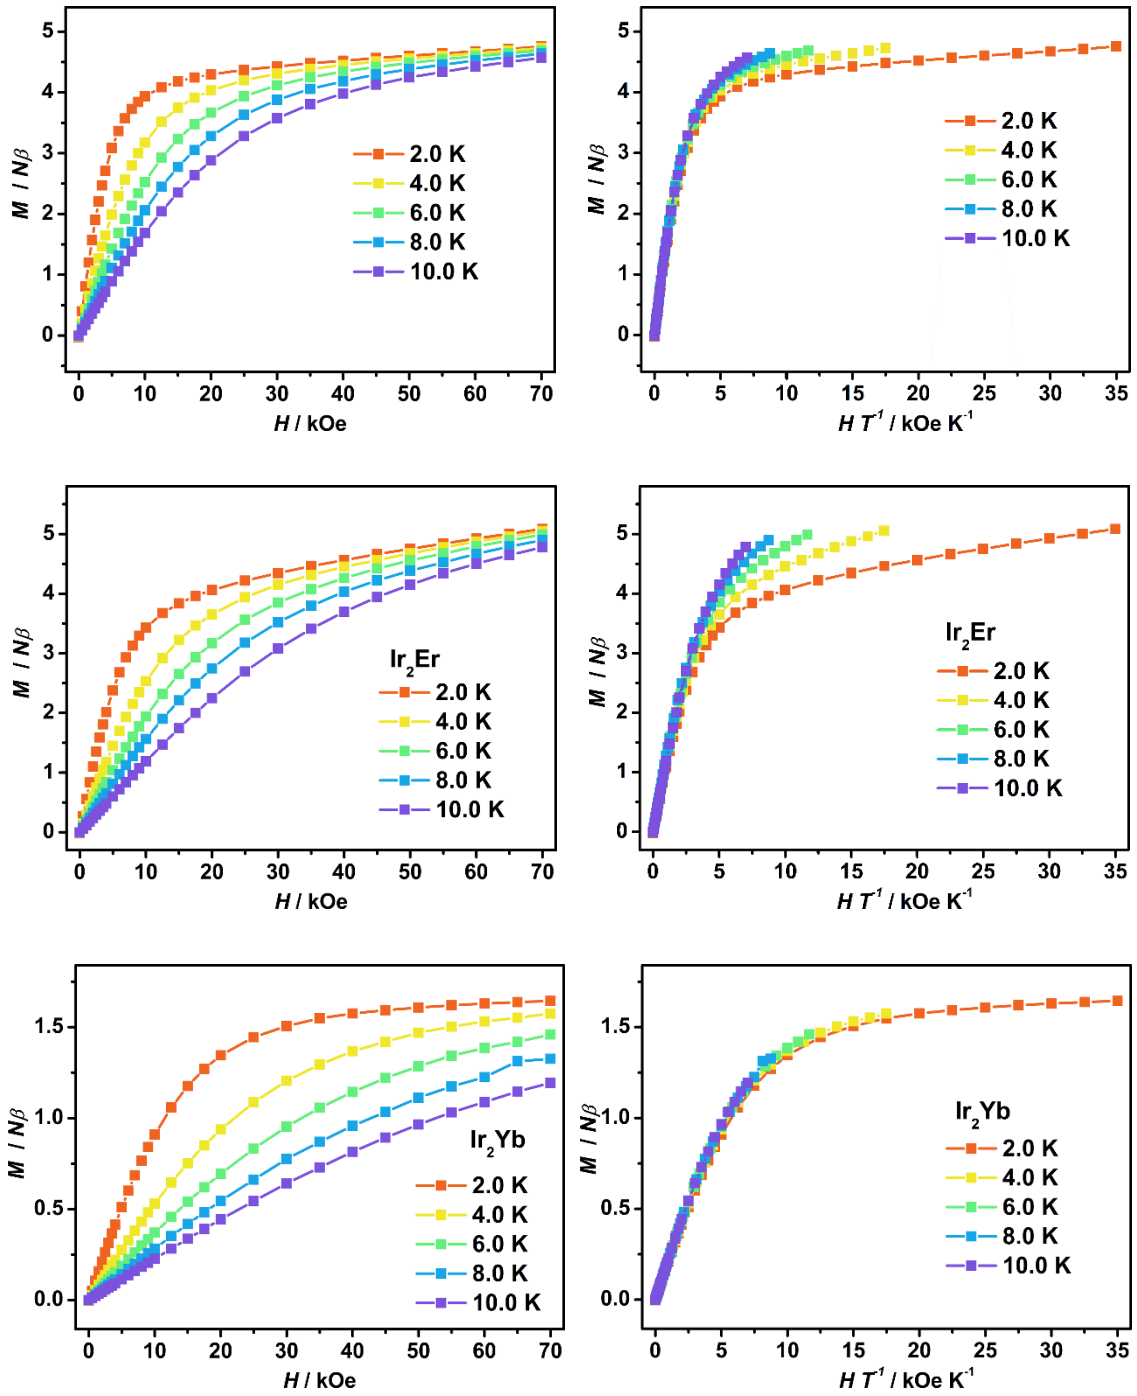

**Figure S12.** The plot of magnetization  $M$  vs.  $H$  and  $M$  vs.  $H/T$  at depicted temperatures for  $\text{Ir}_2\text{Ln}$  ( $\text{Ln}=\text{Dy}, \text{Er}, \text{Yb}$ ).



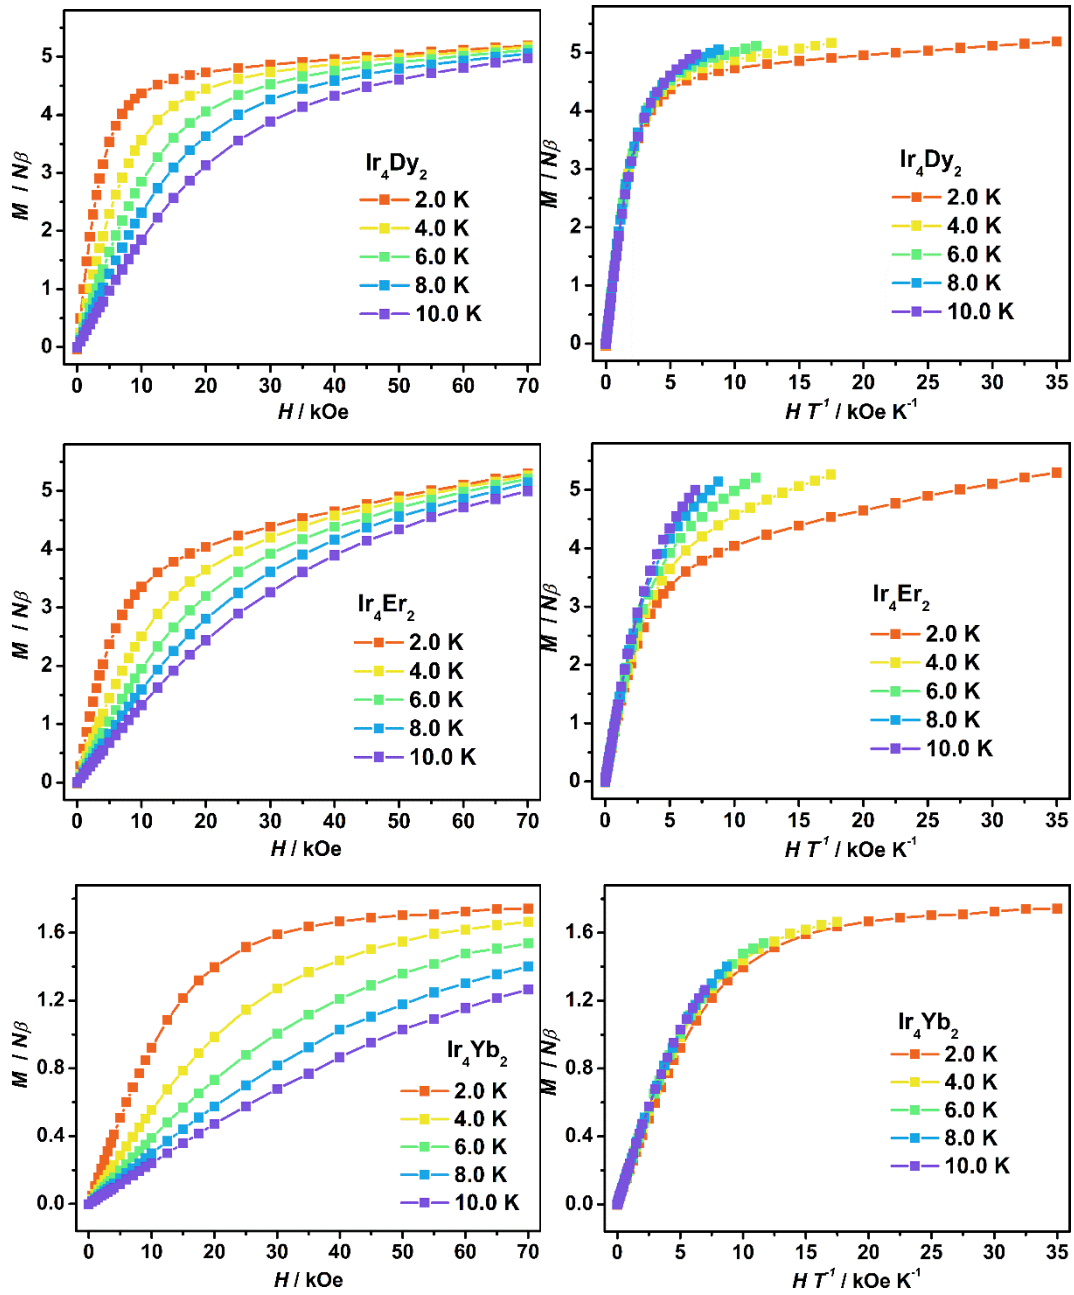

**Figure S13.** The plot of magnetization  $M$  vs.  $H$  and  $M$  vs.  $H/T$  at depicted temperatures for  $\text{Ir}_4\text{Ln}_2$  ( $\text{Ln} = \text{Dy}, \text{Er}, \text{Yb}$ ).

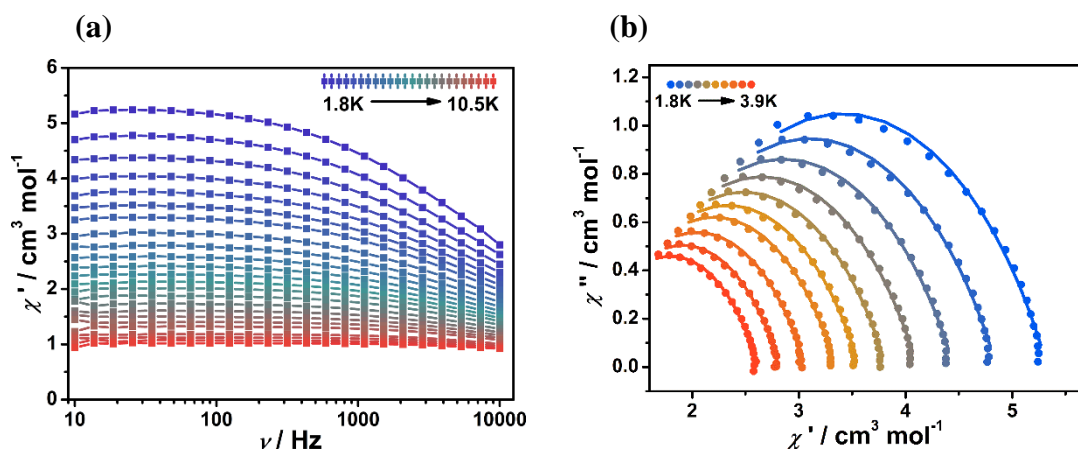

**Figure S14.** (a) The in-phase ( $\chi'$ ) ac susceptibilities and (b) Cole-Cole plot of  $\text{Ir}_2\text{Dy}$  under zero dc field.

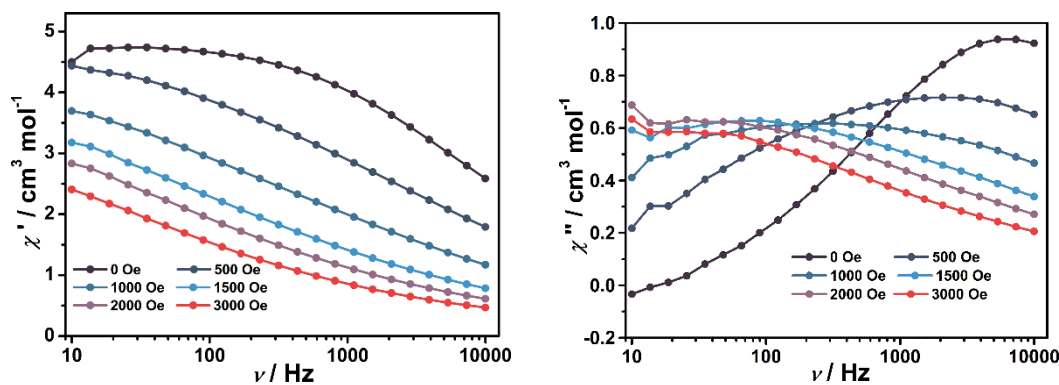

**Figure S15.** In-phase ( $\chi'$ ) and out-of-phase ( $\chi''$ ) ac susceptibilities of  $\text{Ir}_2\text{Dy}$  collected at 1.8 K under dc fields ranging from 0 to 3.0 kOe.

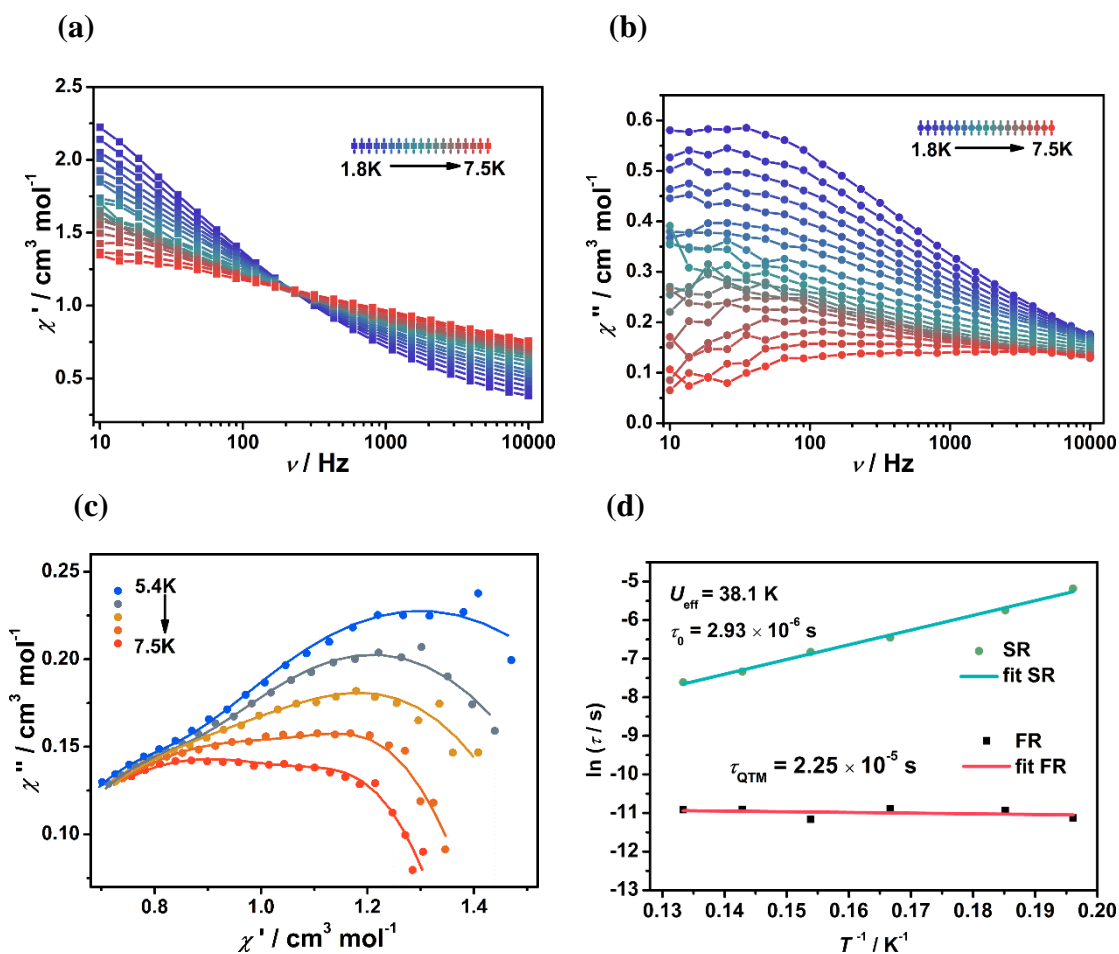

**Figure S16.** The ac susceptibilities for  $\text{Ir}_2\text{Dy}$  under 2.0 kOe dc field at different temperatures: (a) frequency dependence of in-phase ( $\chi'$ ) and (b) out-of-phase ( $\chi''$ ), (c) Cole-Cole plot and (d) plots of  $\ln(\tau)$  vs.  $1/T$ .

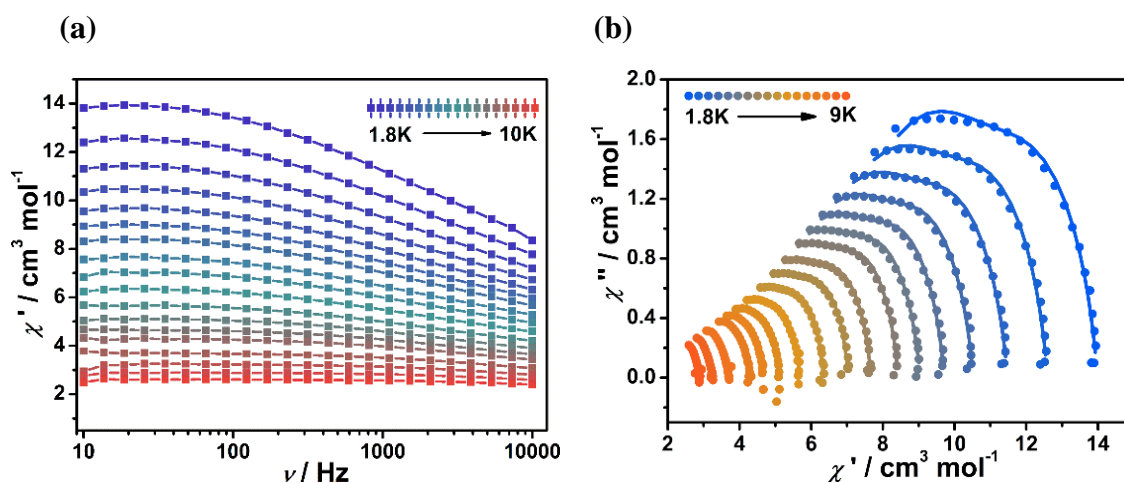

**Figure S17.** (a) The in-phase ( $\chi'$ ) ac susceptibilities and (b) Cole-Cole plot of  $\text{Ir}_4\text{Dy}_2$  under zero dc field.

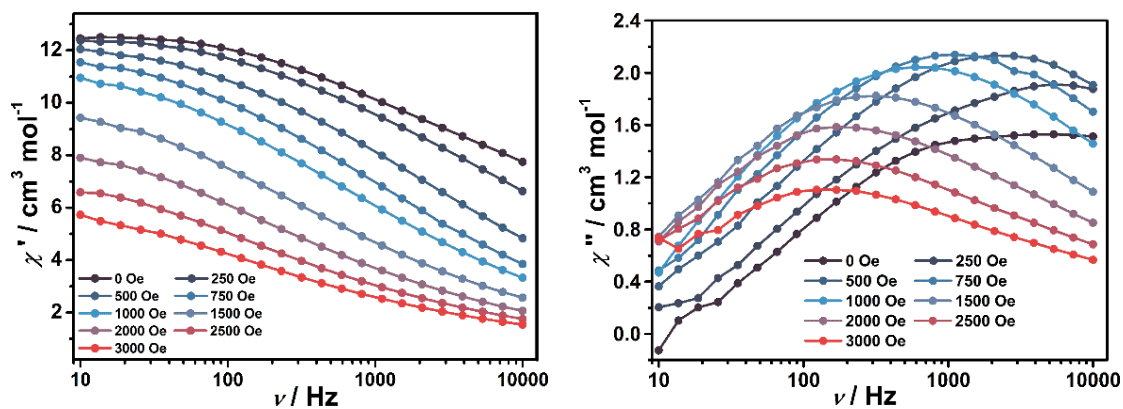

**Figure S18.** In-phase ( $\chi'$ ) and out-of-phase ( $\chi''$ ) ac susceptibilities of  $\text{Ir}_4\text{Dy}_2$  collected at 1.8 K under dc fields ranging from 0 to 3.0 kOe.

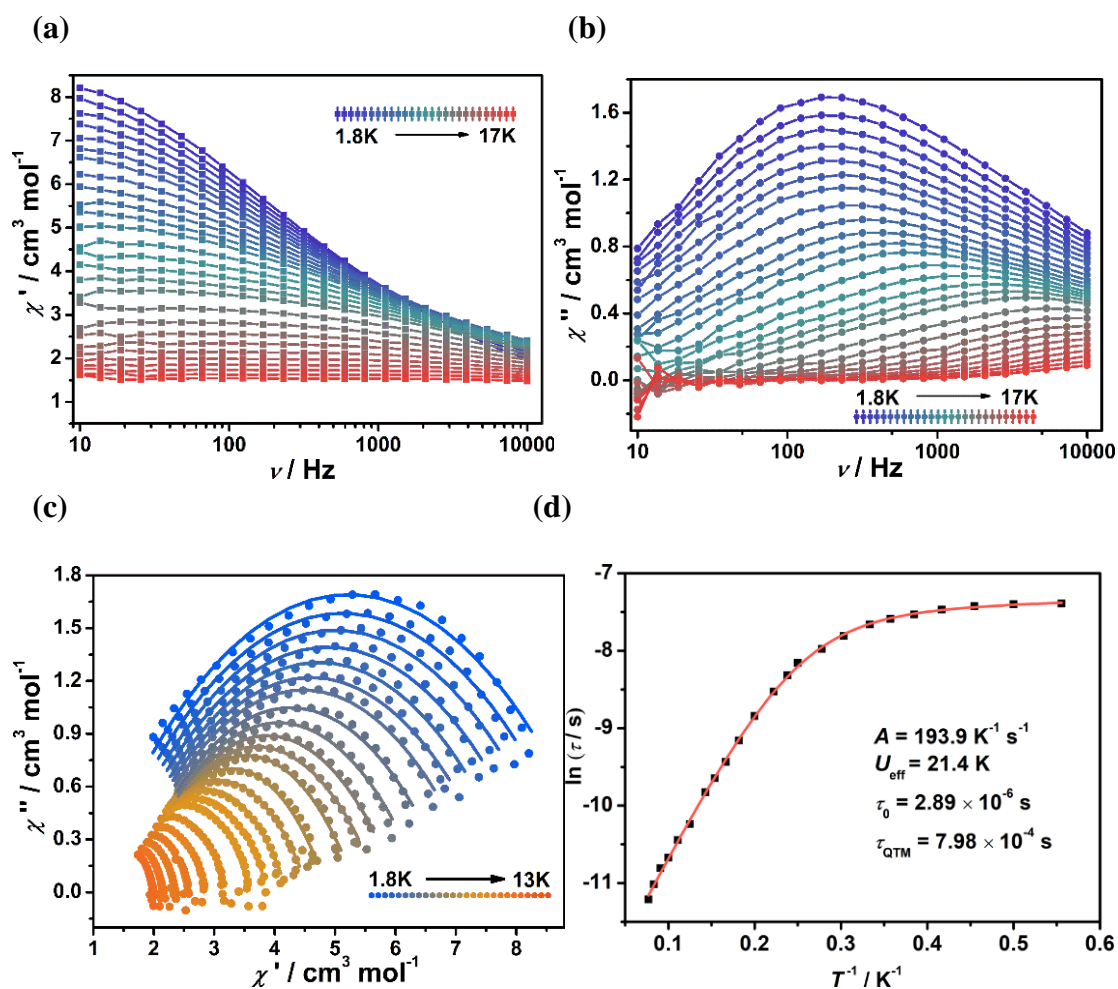

**Figure S19.** The ac susceptibility of  $\text{Ir}_4\text{Dy}_2$  under a 2.0 kOe dc field at different temperatures: (a) frequency dependence of in-phase ( $\chi'$ ) and (b) out-of-phase ( $\chi''$ ), (c) Cole-Cole plot and (d) plots of  $\ln(\tau)$  vs.  $1/T$ .

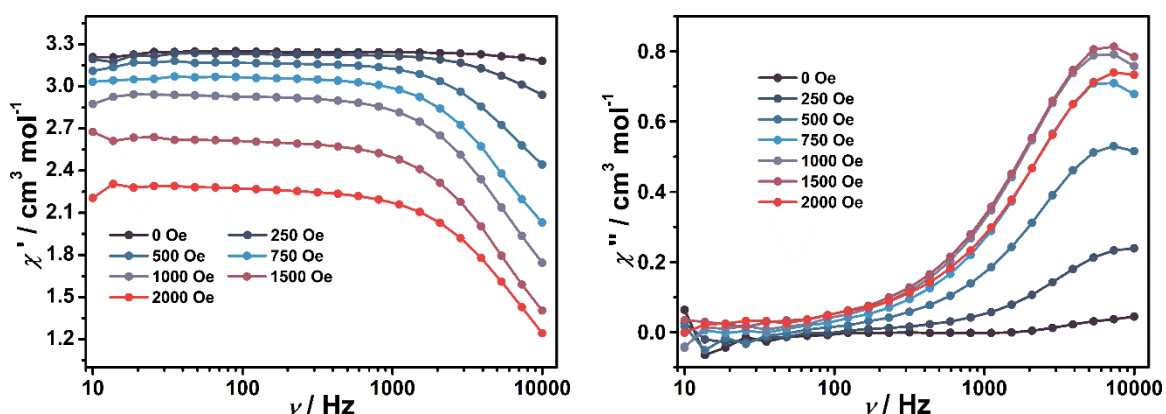

**Figure S20.** In-phase ( $\chi'$ ) and out-of-phase ( $\chi''$ ) ac susceptibilities of  $\text{Ir}_2\text{Er}$  collected at 1.8 K under dc field ranging from 0 to 3.0 kOe.

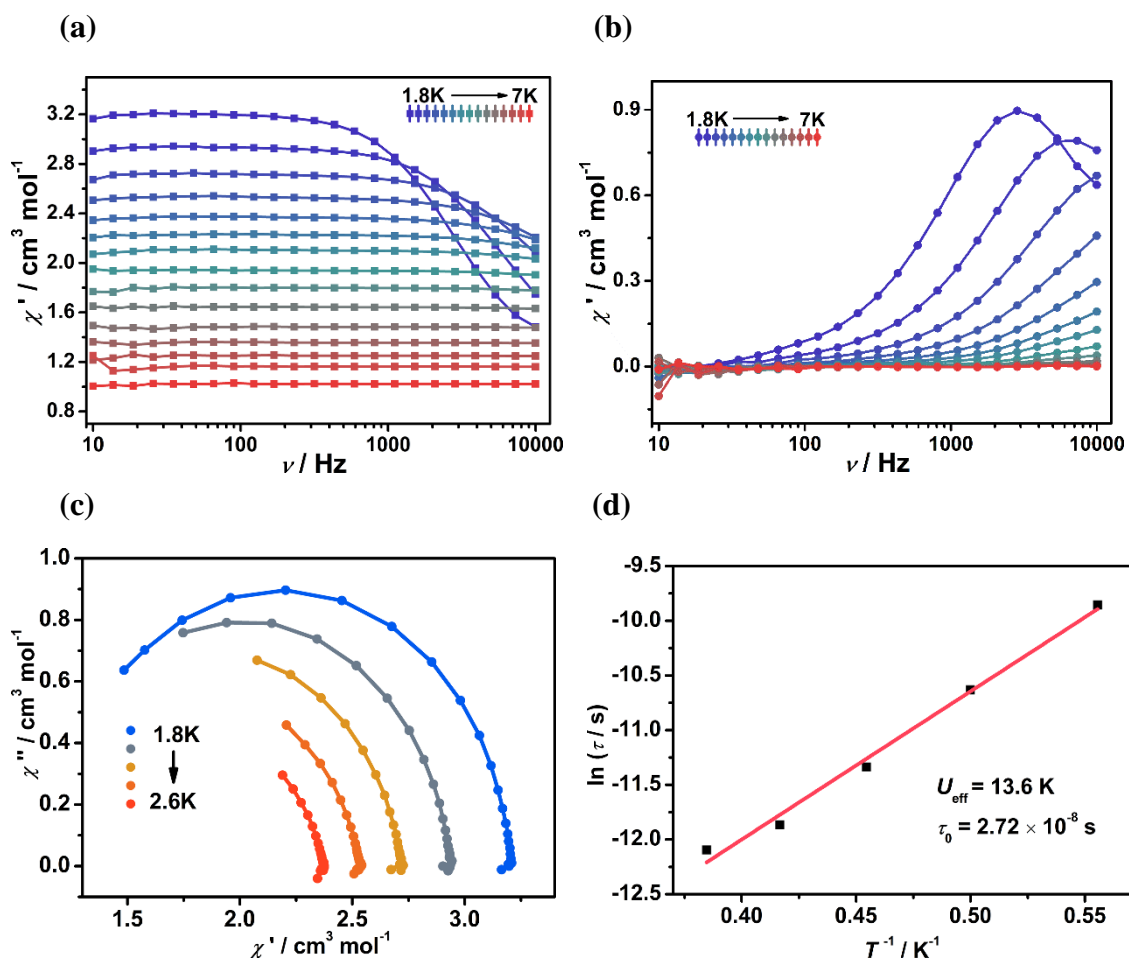

**Figure S21.** The ac susceptibilities of  $\text{Ir}_2\text{Er}$  under a 1.0 kOe dc field at different temperatures: (a) frequency dependence of in-phase ( $\chi'$ ) and (b) out-of-phase ( $\chi''$ ), (c) Cole-Cole plot and (d) plots of  $\ln(\tau)$  vs.  $1/T$ .

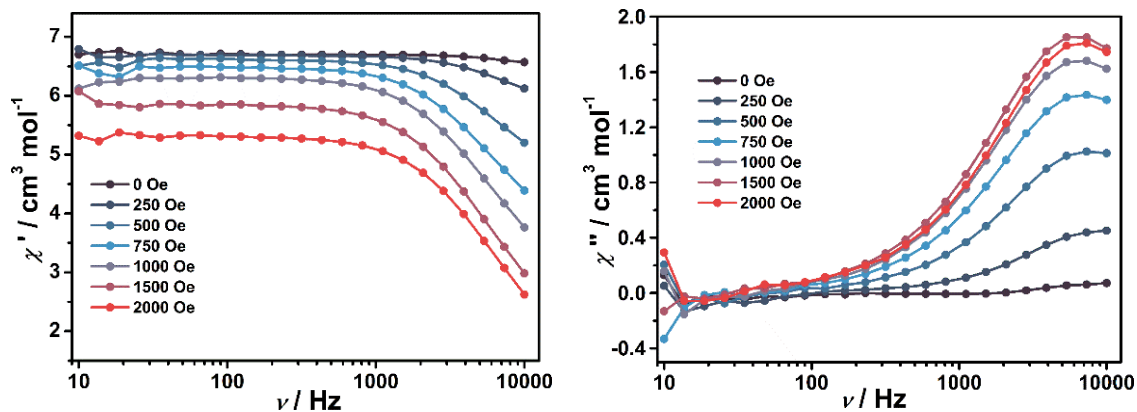

**Figure S22.** In-phase ( $\chi'$ ) and out-of-phase ( $\chi''$ ) ac susceptibilities of  $\text{Ir}_4\text{Er}_2$  collected at 1.8 K under dc field ranging from 0 to 3.0 kOe.

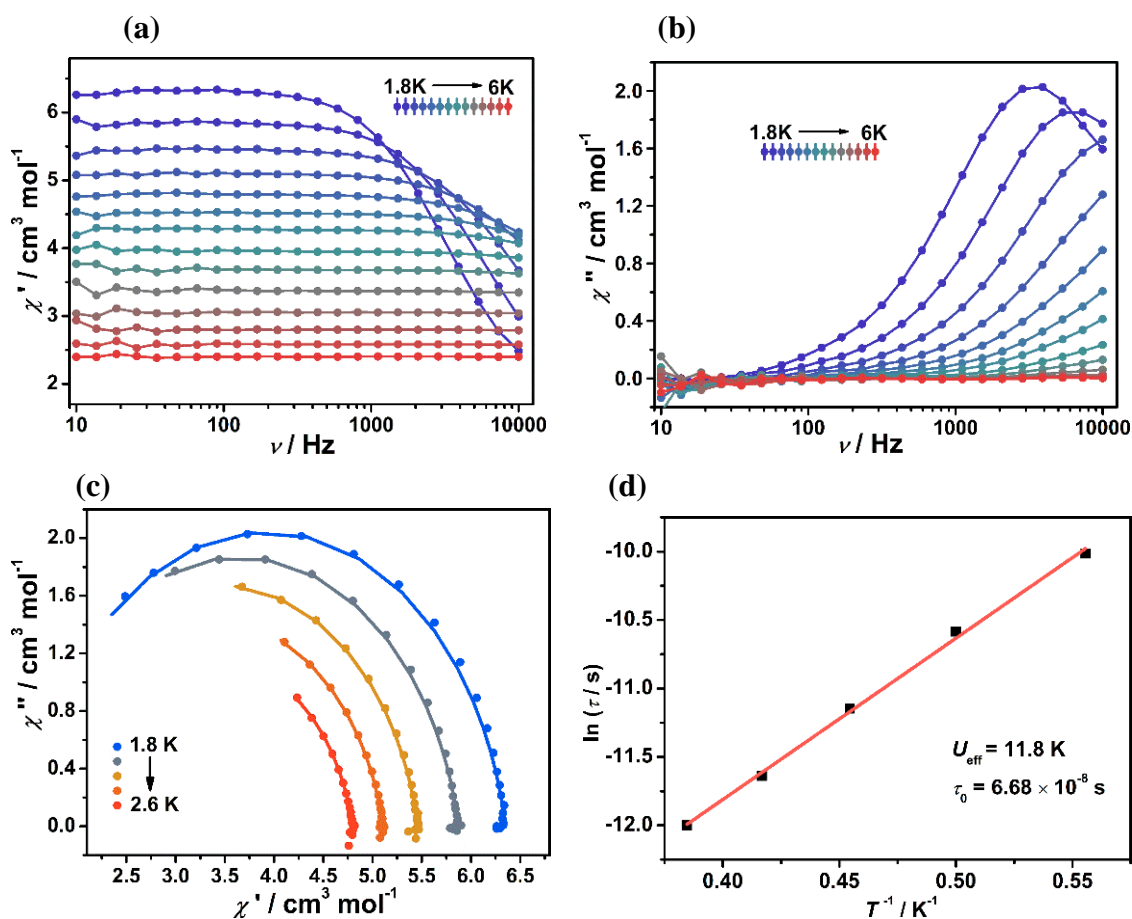

**Figure S23.** The ac susceptibilities of  $\text{Ir}_4\text{Er}_2$  under a 1.5 kOe dc field at different temperatures: (a) frequency dependence of in-phase ( $\chi'$ ) and (b) out-of-phase ( $\chi''$ ), (c) Cole-Cole plot and (d) plots of  $\ln(\tau)$  vs.  $1/T$ .

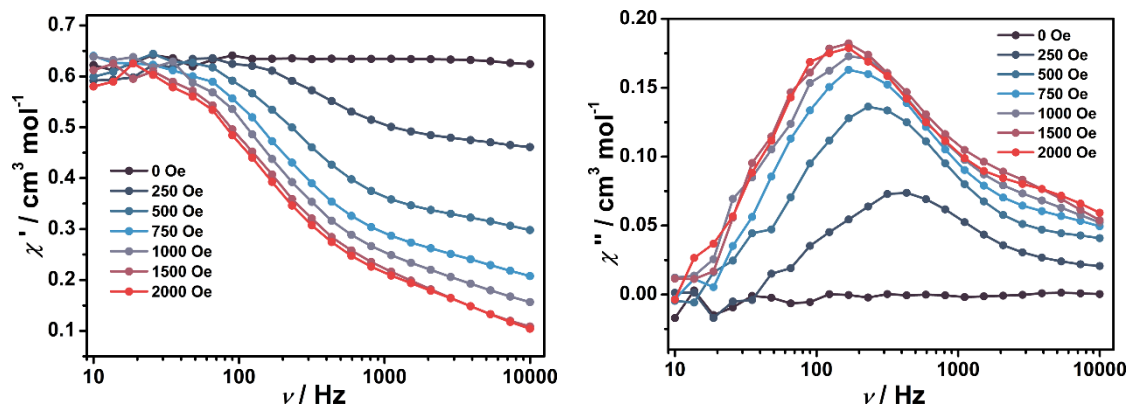

**Figure S24.** In-phase ( $\chi'$ ) and out-of-phase ac susceptibility ( $\chi''$ ) of  $\text{Ir}_2\text{Yb}$  collected at 1.8 K under dc fields ranging from 0 to 3.0 kOe.

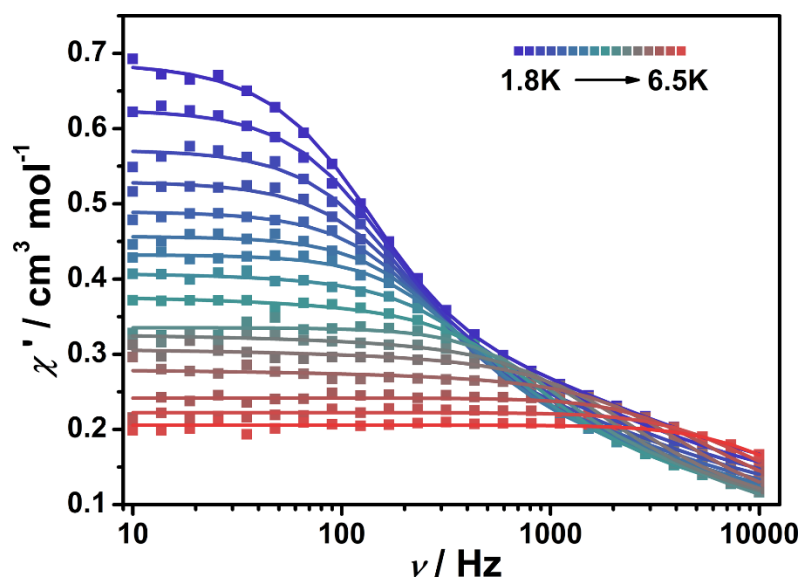

**Figure S25.** The in-phase ( $\chi'$ ) ac susceptibilities of  $\text{Ir}_2\text{Yb}$  under a 1.0 kOe dc field at different temperatures.

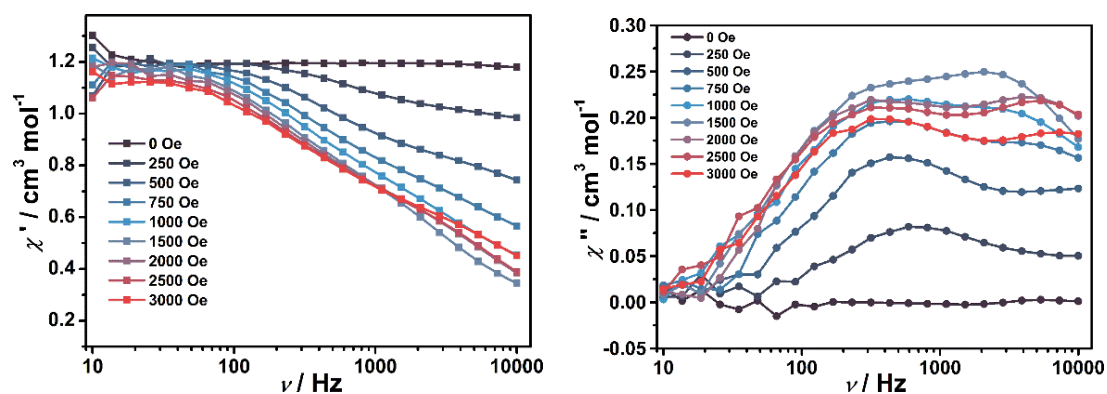

**Figure S26.** In-phase ( $\chi'$ ) and out-of-phase ( $\chi''$ ) ac susceptibilities of  $\text{Ir}_4\text{Yb}_2$  collected at 1.8 K under dc field ranging from 0 to 3.0 kOe.

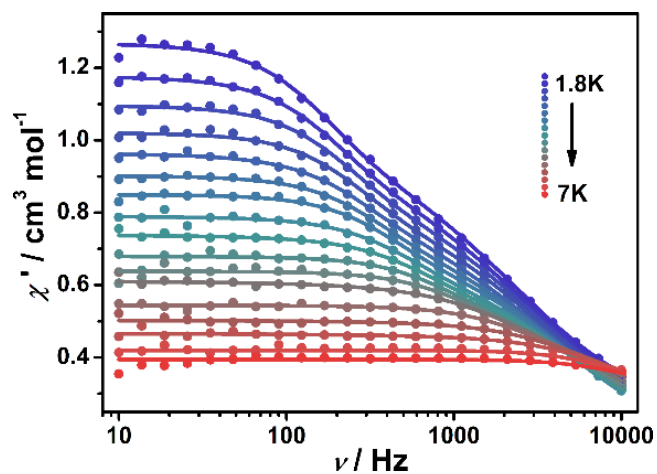

**Figure S27.** The in-phase ( $\chi'$ ) ac susceptibilities of  $\text{Ir}_4\text{Yb}_2$  under a 1.5 kOe dc field at different temperatures.

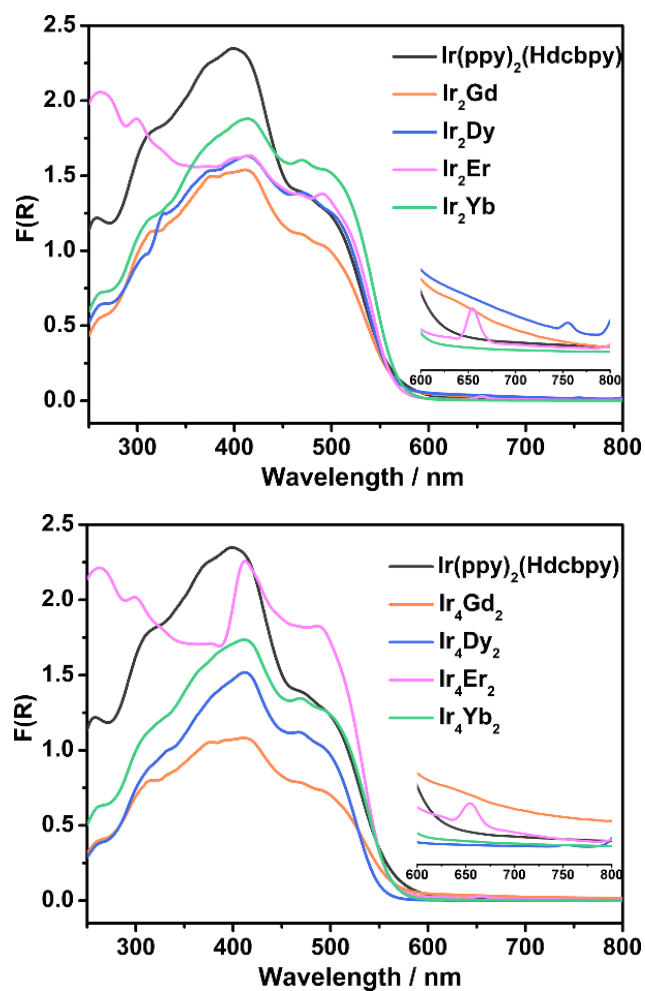

**Figure S28.** The absorption spectra of  $\text{Ir}(\text{ppy})_2(\text{Hdcbpy})$  and of compounds  $\text{Ir}_2\text{Ln}$  and  $\text{Ir}_4\text{Ln}_2$  ( $\text{Ln} = \text{Gd}, \text{Dy}, \text{Er}, \text{Yb}$ ) in the solid-state.



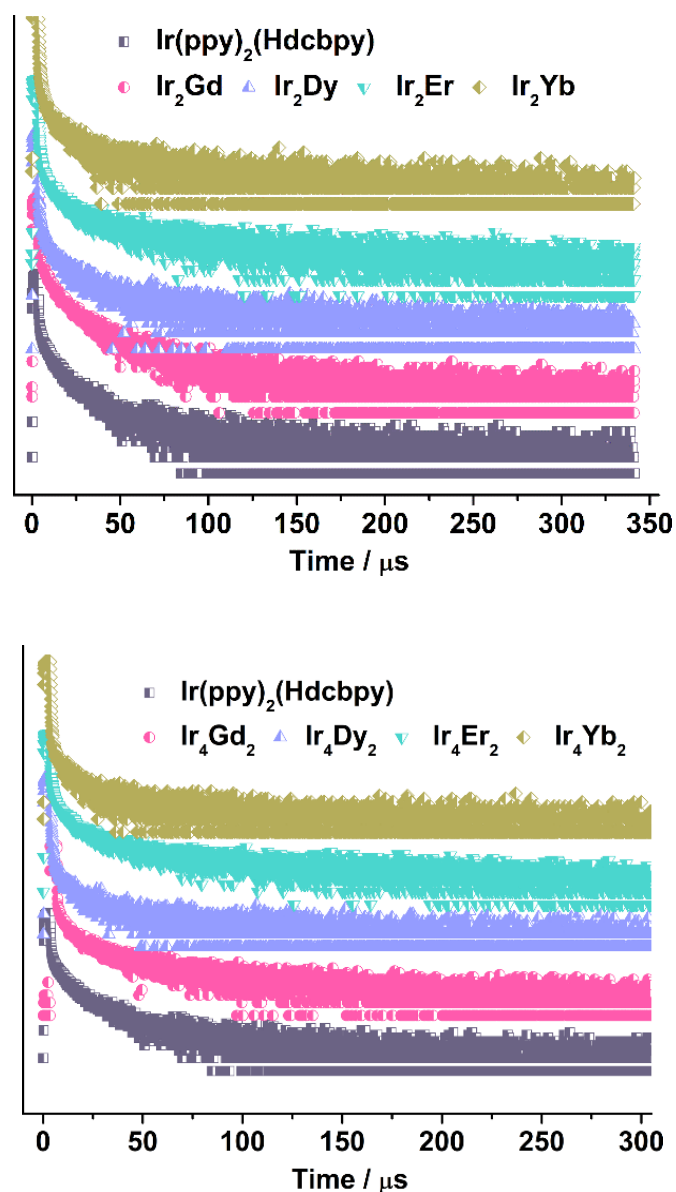

**Figure S29.** The luminescence decay for compounds  $\text{Ir}(\text{ppy})_2(\text{Hdcbpy})$ ,  $\text{Ir}_2\text{Ln}$  and  $\text{Ir}_4\text{Ln}_2$  ( $\text{Ln} = \text{Gd}, \text{Dy}, \text{Er}, \text{Yb}$ ) fitted by bi-exponential function  $I = A + B_1\exp(-t/\tau_1) + B_2\exp(-t/\tau_2)$ , affording lifetimes ( $\tau$ ) of  $6.60 \mu\text{s}$  ( $\chi^2 = 1.37$ ) for  $\text{Ir}(\text{ppy})_2(\text{Hdcbpy})$ ,  $8.69 \mu\text{s}$  ( $\chi^2 = 1.27$ ) for  $\text{Ir}_2\text{Gd}$ ,  $4.79 \mu\text{s}$  ( $\chi^2 = 1.43$ ) for  $\text{Ir}_2\text{Dy}$ ,  $6.37 \mu\text{s}$  ( $\chi^2 = 1.47$ ) for  $\text{Ir}_2\text{Er}$ ,  $2.23 \mu\text{s}$  ( $\chi^2 = 1.39$ ) for  $\text{Ir}_2\text{Yb}$ ,  $7.74 \mu\text{s}$  ( $\chi^2 = 1.33$ ) for  $\text{Ir}_4\text{Gd}_2$ ,  $0.66 \mu\text{s}$  ( $\chi^2 = 1.32$ ) for  $\text{Ir}_4\text{Dy}_2$ ,  $5.47 \mu\text{s}$  ( $\chi^2 = 1.35$ ) for  $\text{Ir}_4\text{Er}_2$  and  $1.24 \mu\text{s}$  ( $\chi^2 = 1.20$ ) for  $\text{Ir}_4\text{Yb}_2$ .

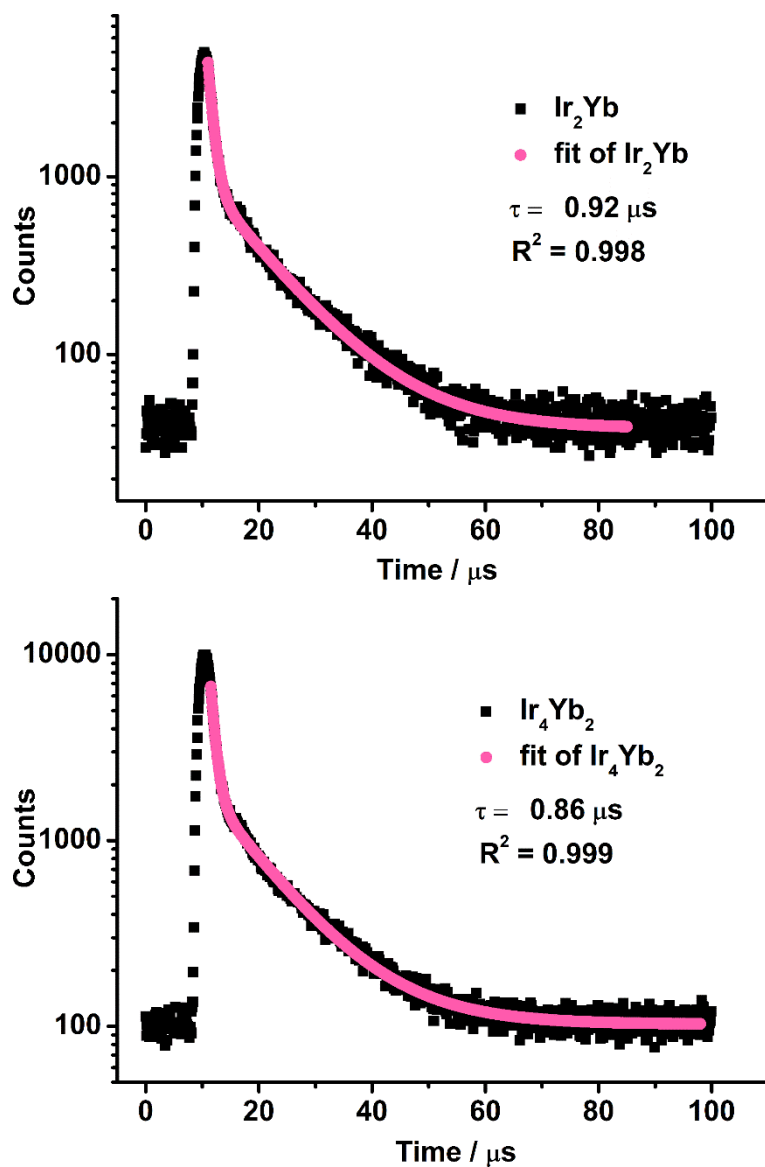

**Figure S30.** Luminescent decay profiles monitored at 975 nm for  $\text{Ir}_2\text{Yb}$  and  $\text{Ir}_4\text{Yb}_2$  in the solid state at room temperature. The lifetime was fitted by bi-exponential function  $I = A + B_1\exp(-t/\tau_1) + B_2\exp(-t/\tau_2)$ .

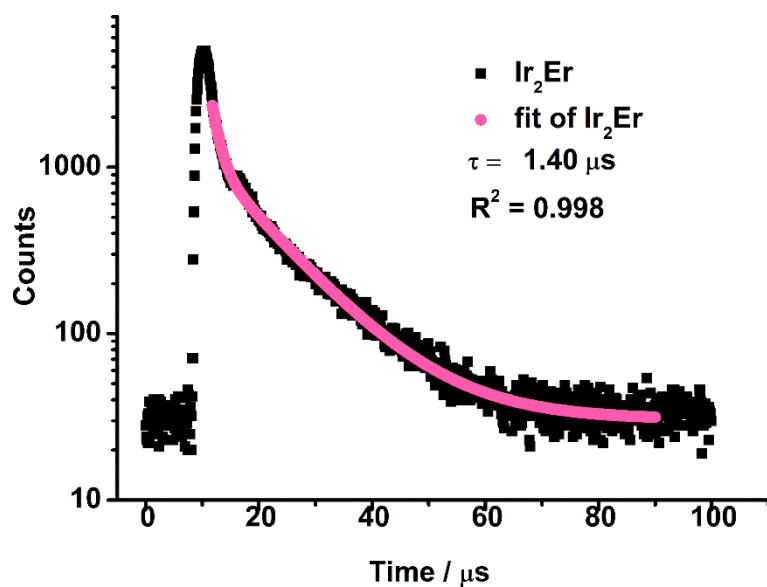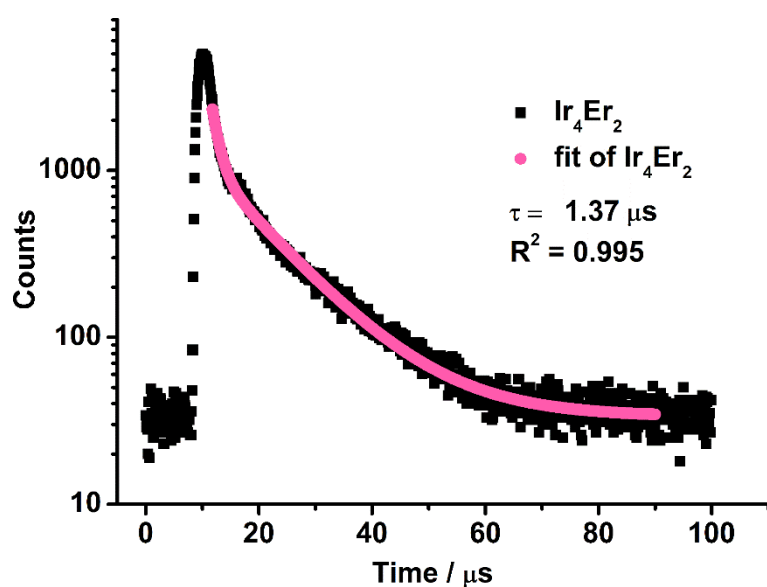

**Figure S31.** Luminescent decay profiles monitored at 1538 nm for **Ir<sub>2</sub>Er** and **Ir<sub>4</sub>Er<sub>2</sub>** in the solid state at room temperature. The lifetime was fitted by bi-exponential function  $I = A + B_1 \exp(-t/\tau_1) + B_2 \exp(-t/\tau_2)$ .

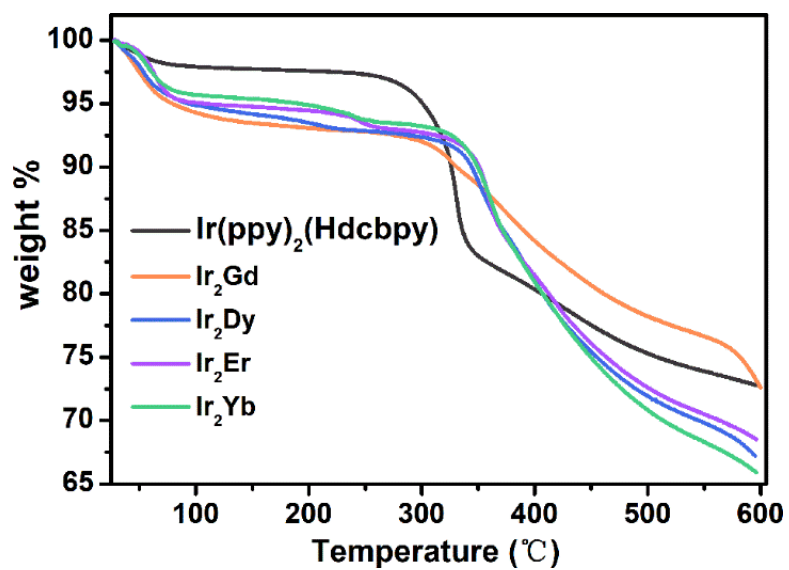

Figure S32. TGA curve of Ir<sub>2</sub>Ln and Ir(ppy)<sub>2</sub>(Hdcbpy).

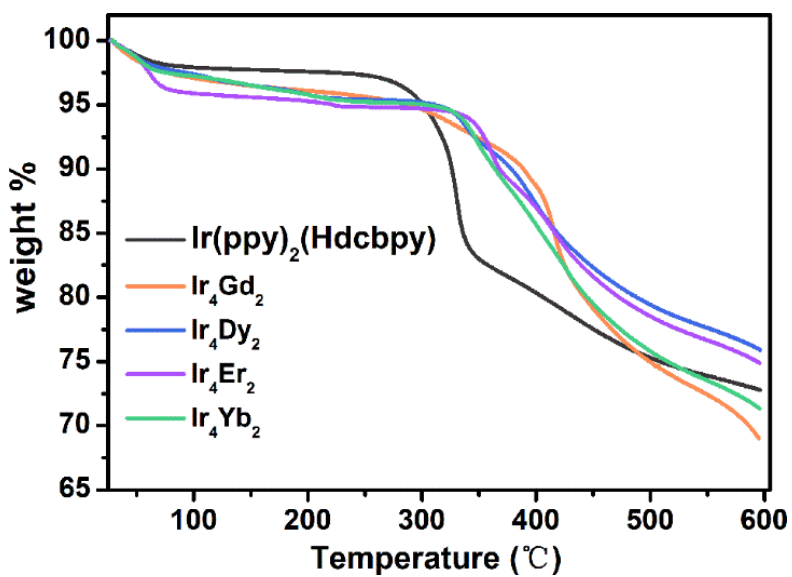

Figure S33. TGA curve of Ir<sub>4</sub>Ln<sub>2</sub> and Ir(ppy)<sub>2</sub>(Hdcbpy).
